# Supplementary material for: Scottish adolescents’ sun-related behaviours, tanning attitudes and associations with skin cancer awareness: a cross-sectional study
Source: PubMed Central journal article supplement — BMJ Open. 2014 May 2;4(5):e005137. doi: 10.1136/bmjopen-2014-005137 (PMC4025409; doi:10.1136/bmjopen-2014-005137), 2014-05-02
Supplement: bmjopen-2014-005137.draft_revisions.pdf [file bmjopen-2014-005137.draft_revisions.pdf]

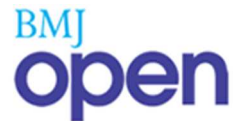

**Scottish adolescents' sun-related behaviours, tanning attitudes and associations with skin cancer awareness: a cross-sectional study**

|                                 |                                                                                                                                                                                                                                                                                                                                                                                                                                                             |
|---------------------------------|-------------------------------------------------------------------------------------------------------------------------------------------------------------------------------------------------------------------------------------------------------------------------------------------------------------------------------------------------------------------------------------------------------------------------------------------------------------|
| Journal:                        | <i>BMJ Open</i>                                                                                                                                                                                                                                                                                                                                                                                                                                             |
| Manuscript ID:                  | bmjopen-2014-005137                                                                                                                                                                                                                                                                                                                                                                                                                                         |
| Article Type:                   | Research                                                                                                                                                                                                                                                                                                                                                                                                                                                    |
| Date Submitted by the Author:   | 26-Feb-2014                                                                                                                                                                                                                                                                                                                                                                                                                                                 |
| Complete List of Authors:       | Kyle, Richard; University of Stirling, School of Nursing, Midwifery and Health<br>MacMillan, Iona; Teenage Cancer Trust,<br>Forbat, Liz; University of Stirling, School of Nursing, Midwifery and Health<br>Neal, Richard; Bangor University, North Wales Centre for Primary Care Research<br>Haw, Sally; University of Stirling, School of Nursing, Midwifery and Health<br>Hubbard, Gill; University of Stirling, School of Nursing, Midwifery and Health |
| <b>Primary Subject Heading</b>: | Public health                                                                                                                                                                                                                                                                                                                                                                                                                                               |
| Secondary Subject Heading:      | Oncology                                                                                                                                                                                                                                                                                                                                                                                                                                                    |
| Keywords:                       | PUBLIC HEALTH, Paediatric oncology < ONCOLOGY, Epidemiology < ONCOLOGY                                                                                                                                                                                                                                                                                                                                                                                      |
|                                 |                                                                                                                                                                                                                                                                                                                                                                                                                                                             |

SCHOLARONE™  
Manuscripts

only

1  
2  
3 **SCOTTISH ADOLESCENTS' SUN-RELATED BEHAVIOURS, TANNING ATTITUDES AND**  
4  
5 **ASSOCIATIONS WITH SKIN CANCER AWARENESS: A CROSS-SECTIONAL STUDY**  
6  
7  
8

9  
10 Richard G Kyle\*<sup>1</sup>

11 Iona Macmillan<sup>2</sup>

12 Liz Forbat<sup>1</sup>

13 Richard D Neal<sup>3</sup>

14 Ronan E O'Carroll<sup>4</sup>

15 Sally Haw<sup>5</sup>

16 Gill Hubbard<sup>1</sup>

17  
18  
19  
20  
21  
22  
23  
24  
25  
26  
27 <sup>1</sup> Cancer Care Research Centre, School of Nursing, Midwifery and Health, University of Stirling,  
28 Stirling, UK, FK9 4LA

29  
30  
31 <sup>2</sup> Teenage Cancer Trust, 93 Newman Street, London, UK, W1T 3EZ

32  
33 <sup>3</sup> North Wales Centre for Primary Care Research, Bangor University, Bangor, UK, LL13 7YP

34  
35 <sup>4</sup> Division of Psychology, School of Natural Sciences, University of Stirling, Stirling, UK, FK9 4LA

36  
37 <sup>5</sup> School of Nursing, Midwifery and Health, University of Stirling, Stirling, UK, FK9 4LA

38  
39  
40  
41  
42 \* Corresponding author

43 Email: richard.kyle@stir.ac.uk

44 Telephone: +44(0)1463 255623  
45  
46  
47  
48  
49  
50  
51  
52  
53  
54  
55  
56  
57  
58  
59  
60

**ABSTRACT**

**Objectives:** To describe Scottish adolescents' sun-related behaviours and tanning attitudes and assess associations with skin cancer awareness.

**Design:** Cross-sectional study.

**Setting:** 20 state secondary schools in one Scottish local authority (Glasgow City).

**Participants:** 2,173 adolescents (female: 50.7%, n=1,102) with a mean age of 12.4 (Standard Deviation = 0.55).

**Outcome measures:** Sun-related behaviour (suntan, sunbathing, sunburn, sunscreen use, sunbed use), tanning attitudes, skin cancer-related symptom and risk factor awareness.

**Results:** Adolescents reported poor sun-related practice: 51% of adolescents reported sunburn the previous summer and 38% indicated sunburn on more than one occasion. Skin cancer awareness was low: 45% recognised 'change in the appearance of a mole' as a cancer symptom, and 39% agreed that 'getting sunburnt more than once as a child' increased cancer risk. 42% and 26% of adolescents, respectively, reported that friends and family held pro-tanning attitudes. Compared to males, females were statistically significantly more likely to: report sunbathing ( $p<0.001$ ), use of lotions or oil to aid tanning ( $p<0.001$ ), and sunburn ( $p<0.001$ ); know that changes in the appearance of a mole was a skin cancer symptom ( $p=0.036$ ) and sunburn more than once as a child was a skin cancer risk factor ( $p=0.005$ ); perceive their friends to hold pro-tanning attitudes ( $p<0.001$ ) and indicate that a tan made them feel better about themselves ( $p<0.001$ ), more attractive to others ( $p=0.011$ ) and healthier ( $p<0.001$ ).

**Conclusions:** Scottish adolescents had poor sun protection practice and low skin cancer awareness. Girls adopted riskier sun-related behaviour despite greater awareness of skin cancer-related risk. Urgent action is required to promote positive sun-related behaviour and increase skin cancer awareness among Scottish adolescents. However, further research is needed to inform the development of effective sun-safe interventions.

**STRENGTHS AND LIMITATIONS OF THIS STUDY**

- This is the first study to describe Scottish adolescents' sun-related behaviours and tanning attitudes and assess associations with cancer symptom and risk factor awareness.
- Findings establish evidence to support on-going government initiatives to increase the proportion of people with early diagnosis, including the National Awareness and Early Diagnosis Initiative (NAEDI) in England and Detect Cancer Early (DCE) in Scotland.
- Adolescents in only one Scottish local authority area were surveyed and non-probabilistic sampling was used, although Glasgow was purposefully selected due to known high incidence of malignant melanoma in the Central Belt of Scotland, a densely populated urban region extending from Glasgow in the West to Edinburgh in the East.

**KEYWORDS**

Malignant melanoma, skin cancer, tanning attitudes, sunburn, sunbeds, sun protection, health-related behaviour, health promotion

**WORD COUNT**

3,512

## INTRODUCTION

Rates of malignant melanoma are rising more rapidly than for any other cancer in the United Kingdom (UK) [1] and Scotland has above average incidence when compared to the rest of the UK.[2] Incidence of malignant melanoma in Scotland significantly increased by 51.4% ( $p < 0.0001$ ) over the past decade.[3] Light skin colour, blonde or red hair, number of moles,[4] family history,[5] and excess exposure to ultraviolet radiation, particularly in childhood, are the main risk factors for malignant melanoma.[6] It is estimated that 86% of malignant melanoma cases in the UK can be attributable to excess exposure to UV radiation (Male = 90%, Female = 82%), and that these proportions are “very much greater at younger ages”.[7]

Malignant melanoma is the fifth most common teenage and young adult (TYA) cancer in the UK, accounting for 11% of the 2,200 average annual cases among those aged 15-24.[8] Almost twice as many females ( $n=153$ ) than males ( $n=73$ ) are diagnosed with malignant melanoma annually, making it the third and sixth most common cancer in young women and men, respectively.[8] Incidence of malignant melanoma significantly increased by 32% among young females between 1995 and 2009.[8]

Across the UK survival rates for malignant melanoma are high and increasing over time,[9] and in Scotland five-year survival rates rose by 21% over the past 20 years, from 64% in the period 1983-97 to 85% in 2003-07.[10] Survival is higher in younger people[10] and there is some evidence that longer time durations prior to diagnosis may be associated with poorer outcomes.[11-13] UK government health departments are therefore committed to improving awareness as part of a strategy to increase the proportion of people with early diagnosis.[14,15] Increasing adolescents’ awareness of skin cancer risk associated with UV exposure and encouraging sun protective practices may therefore have potential to reduce the burden of malignant melanoma both in adolescence and

1  
2  
3 early adulthood, as well as later life through the establishment of protective health-related  
4 behaviours. However, previous research has found that although adolescents' awareness of skin  
5 cancer and its association with UV exposure is generally good [16,17] this knowledge does not  
6 translate into sun-safe behaviour,[18,19] especially among young females.[19-21]  
7  
8  
9  
10

11  
12 Little evidence exists around the association between sun-related behaviours and cancer awareness  
13 among adolescents in the UK. Only one UK study to date has examined the association between  
14 sunscreen and sunbed use and cancer awareness, which found that female adolescents who used  
15 sunbeds were statistically significantly more likely to agree that UV exposure was a cancer risk  
16 factor.[21] Moreover, patterns of sun-related behaviours (i.e., sunbathing, sunburn) and protective  
17 practices (i.e., sunscreen use) and tanning attitudes among Scottish adolescents have not previously  
18 been described. This lack of evidence hampers development of interventions to increase cancer  
19 awareness and change sun-related behaviours in support of government initiatives. Hence, the aims  
20 of this study were to: 1) describe the sun-related behaviours and tanning attitudes among Scottish  
21 adolescents; and 2) assess associations between sun-related behaviour, tanning attitudes and cancer  
22 awareness.  
23  
24  
25  
26  
27  
28  
29  
30  
31  
32  
33  
34  
35  
36  
37  
38  
39

## 40 **METHODS**

### 41 **Study design**

42  
43 Data are drawn from the Adolescent Cancer Education (ACE) study, the design of which is described  
44 in the published protocol.[22] Briefly, ACE is a cluster randomised controlled trial (RCT) to assess the  
45 effectiveness of a school-based educational intervention on adolescents' and parents' cancer  
46 awareness and communication. Data were collected at three time-points: baseline (prior to  
47 intervention delivery), and at two-weeks, and six-month follow-up. This paper reports cross-  
48 sectional analysis of baseline data.  
49  
50  
51  
52  
53  
54  
55  
56  
57  
58  
59  
60

### Setting and Sample

All 29 state secondary schools (excluding special schools) in the Glasgow City Council are were invited to participate, and the target of 20 schools (69.0%) were recruited. All 3,223 adolescents on the school register at the end of their first year (S1) of secondary education (age 12/13 years) in study schools were invited to participate in the study, of which 2,173 (67.4%) consented to data collection.

### Recruitment and consent

Schools were recruited in May 2013 and adolescents in June 2013. School head teachers were contacted by letter, which was followed up with a telephone call and face-to-face meeting to invite participation in the study. Parents/carers were sent a letter and information sheet about the study, which included a form to be returned to school if they wished to opt their child out of the study. The opt-out method of parental consent has been found to be ethically acceptable.[23] Adolescents were provided with an information sheet at the time measurements were undertaken and also asked to give written consent to their participation in the study.

### Survey instrument

Data were collected using a self-complete paper questionnaire administered by teachers to a whole class under exam conditions but students were informed that it was not a test. Teachers encouraged students to complete as much of the questionnaire as they could within the 50 or 55 minute lesson period.

The instrument incorporated validated questions on adolescents' sun-related behaviours and tanning attitudes,[19] the Cancer Awareness Measure (CAM),[24,25] and socio-demographic questions.

### *Sun-related behaviours and tanning attitudes*

Adolescents' tanning attitudes and sun-related behaviours were assessed using items from an instrument developed in New Zealand.[19] Sun-related behaviours, including sunbathing, getting a suntan, use of sun beds and sun-protection practices were assessed through ten questions.

Attitudes towards tanning were assessed through five statements which used a five-point Likert scale to ask adolescents if a suntan made them 'feel healthier', 'more attractive to others' or 'better about themselves', and if friends and family thought that a suntan was a 'good thing'. For analysis, responses were dichotomised (i.e., 'yes' versus 'no'; 'strongly agree'/'agree' versus 'neither agree nor disagree'/'disagree'/'strongly disagree').

### *Skin cancer symptom and risk factor awareness*

Adolescents' awareness of skin cancer related symptoms and risk factors were assessed through two questions in the CAM. Awareness of the cancer sign 'change in the appearance in a mole' was assessed alongside eight other cancer signs and symptoms through a recognition question.

Awareness of the skin cancer-related risk factor 'getting sunburnt more than once as a child' was assessed alongside ten other cancer risk factors on a five-point Likert scale. In accordance with previous practice,[21,25] responses were dichotomised for analysis (i.e., mole: 'Yes' versus 'No'/'Don't know'; sunburn: 'strongly agree'/'agree' versus 'not sure'/'disagree'/'strongly disagree').

### *Socio-demographic characteristics*

Socio-demographic questions were included to gather data on: age, gender, ethnicity, and whether the student had been diagnosed with cancer or knew a relative or friend who had been diagnosed with cancer.



### Data analysis

Descriptive statistics were calculated for demographic variables (i.e., age, gender, ethnicity, knowing someone with cancer), sun-related behaviours and tanning attitudes, and skin cancer related symptom and risk factor awareness. Pearson's chi-square ( $\chi^2$ ) tests were used to assess associations between: (1) sun-related behaviours and gender; (2) tanning attitudes and gender and sun-related behaviour; (3) skin cancer-related symptom and risk factor awareness and gender, sun-related behaviours, and tanning attitudes. Data were analysed using SPSS 19.0. Significance tests were two-sided;  $p < 0.05$  was considered statistically significant.

### Ethical considerations

Approval for the study was obtained from the Research Ethics Committee in the School of Nursing, Midwifery and Health, University of Stirling. Glasgow City Council, Planning, Performance and Research Unit approved the involvement of secondary schools. All General Practitioner (GP) practices in the research site were informed about the study.

## RESULTS

### Sample

The sample included 2,173 (female:  $n=1,102$ , 50.7%) adolescents with a mean age of 12.4 (Standard Deviation [SD] = 0.55) at the time of the survey. Socio-demographic characteristics of respondents are shown in Table 1.

*[Insert Table 1 here]*

## Sun-related behaviours

### *Suntan*

Around two-thirds (61.3%, n=1,333) of adolescents reported getting a suntan last summer. Slightly more girls than boys reported a suntan, although this difference was not statistically significant (Girls: 66.2% [n=700], Boys: 63.4% [n=616];  $\chi^2(1, 2030)=1.73, p=0.189$ ).

### *Sunbathing*

Four in ten (42.2%, n=916) adolescents reported sunbathing regularly last summer to try to get a tan. Girls were statistically significantly more likely to report sunbathing (Girls: 57.8% [n=611], Boys: 30.4% [n=294];  $\chi^2(1, 2025)=152.86, p<0.001$ ). Of those who sunbathed, 44.2% (n=405) reported using oils or lotions to aid tanning. Girls who sunbathed were statistically significantly more likely than boys to report using oils or lotions to help get a tan (Girls: 47.4% [n=289], Boys: 38.1% [n=111];  $\chi^2(1, 901)=6.80, p=0.009$ ).

### *Sunburn*

Half of adolescents (51.2%, n=1,112) reported getting sunburnt last summer, of whom around two-thirds (61.7%, n=686) reported getting sunburnt on one occasion, and over a third (38.3%, n=426) reported getting sunburnt on more than one occasion. Girls were statistically significantly more likely to report getting sunburnt last summer (Girls: 62.6% [n=625], Boys: 52.7% [n=476];  $\chi^2(1, 1902)=19.34, p<0.001$ ). Of girls who reported getting sunburnt (n=625), almost 1 in 10 (8.2%, n=51) said that their 'skin went red, sore and blistered', nearly 4 in 10 (39.0%, n=244) said their 'skin went red and sore'; 24.0% (n=150) reported their 'skin went red but not sore' and 27.7% (n=173) said their 'skin went pink or slightly red'. A greater proportion of boys than girls reported 'red, sore and blistered skin' (11.3%, n=54), although fewer reported that their 'skin went red and sore' (34.2%,

1  
2  
3 n=163); 24.4% (n=116) reported their 'skin went red but not sore', and 27.9% (n=133) said their 'skin  
4  
5 went pink or slightly red'.  
6

#### 7 *Sunscreen use*

8  
9 Nearly a fifth of adolescents (16.8%, n=365) reported that they 'didn't usually use sunscreen'. Of  
10  
11 those who reported using sunscreen (74.0%, n=1609), over half (52.6%, n=847) did not know the Sun  
12  
13 Protection Factor (SPF) of the sunscreen they usually used. The greatest proportion of adolescents  
14  
15 who could identify the SPF of their sunscreen used SPF >30 (19.7%, n=317), followed by: SPF30  
16  
17 (15.2%, n=244); SPF15 (8.0%, n=129), and SPF <15 (4.5%, n=72).  
18  
19

20  
21  
22 Of those who reported getting sunburnt (51.2%, n=1,112), 1 in 10 (11.6%, n=129) reported that they  
23  
24 did not use sunscreen. Boys who got sunburnt were statistically significantly more likely to report  
25  
26 not using sunscreen, with over 1 in 4 reporting that they did not use sunscreen (Boys: 27.9% [n=72],  
27  
28 Girls: 15.4% [n=57];  $\chi^2(1, 629)=14.69, p<0.001$ ).  
29  
30  
31

#### 32 *Sunbed use*

33  
34 1 in 20 (5.8%, n=127) adolescents reported using a sunbed in the last 12 months. There was no  
35  
36 statistically significant gender difference in sunbed use (Girls: 6.3% [n=66], Boys: 6.3% [n=59];  $\chi^2(1,$   
37  
38 1980)=0.003, p=0.959).  
39  
40  
41

#### 42 **Tanning attitudes**

43  
44 Peers exerted the greatest influence on adolescents' attitudes towards tanning with two-fifths  
45  
46 (42.3%, n=918) stating that they strongly agreed or agreed with the statement 'most of my friends  
47  
48 think a suntan is a good thing'. A quarter of adolescents (26.1%, n=567) agreed that their family  
49  
50 thought a suntan was a good thing. A fifth of adolescents agreed that a suntan made them feel  
51  
52 better about themselves (22.7%, n=492) and that a suntan made them feel more attractive to others  
53  
54  
55  
56  
57  
58  
59  
60

1  
2  
3 (18.8%, n=409). A tenth (12.3%, n=267) agreed that they liked to have a suntan because it made  
4  
5 them feel healthier. Gender differences were investigated and are summarised in Table 2.  
6  
7

8  
9  
10 *[Insert Table 2 here]*  
11

12  
13 Adolescents of both sexes who reported sunbathing were statistically significantly more likely to  
14  
15 agree with each of the five tanning attitude statements than those who did not report sunbathing  
16  
17 (Table 3). Boys who reported using sunbeds were statistically significantly more likely to agree with  
18  
19 four of the five statements, the exception being the statement 'most of my friends think a suntan is  
20  
21 a good thing' for which there was no difference between boys who did and did not report sunbed  
22  
23 use (Table 3).  
24  
25  
26

27  
28  
29 *[Insert Table 3 here]*  
30  
31

### 32 **Sun-related behaviour and cancer awareness**

#### 33 *Symptom awareness*

34  
35  
36 Less than half (45.2%, n=982) of adolescents thought that change in the appearance of a mole could  
37  
38 be a sign of cancer. Girls were statistically significantly more likely to recognise that a change in the  
39  
40 appearance of a mole was potentially a sign of cancer (Girls: 48.0% [n=524]; Boys: 43.5% [n=444];  
41  
42  $\chi^2(1, 2112)=4.38, p=0.036$ ).  
43  
44  
45

46  
47  
48 The only statistically significant association between symptom awareness and sun-related behaviour  
49  
50 was among females who reported getting sunburnt who were more likely to agree that a change in  
51  
52 the appearance of a mole was potentially a sign of cancer (Table 4).  
53  
54

#### 55 *Risk factor awareness*

56  
57  
58  
59  
60

1  
2  
3 Four in ten (39.1%, n=849) adolescents thought that getting sunburnt more than once as a child was  
4 a risk factor of cancer. Girls were statistically significantly more likely to agree that getting sunburnt  
5 more than once as a child was a cancer risk factor (Girls: 43.4% [n=469]; Boys: 37.3% [n=370];  $\chi^2(1,$   
6  
7  
8  
9  
10 2071)=7.95, p=0.005).

11  
12  
13  
14 There were no statistically significant associations between awareness of getting sunburnt more  
15 than once as a child and sun-related behaviours, although adolescents of both sexes who reported  
16 getting sunburnt were more likely to agree that sunburn was a cancer risk factor (Table 4).  
17  
18  
19

20  
21  
22 *[Insert Table 4 here]*  
23  
24  
25

## 26 **DISCUSSION**

27  
28  
29 Scottish adolescents' awareness of the symptoms and risk factors associated with skin cancer was  
30 low: less than half of adolescents identified 'change in the appearance of a mole' as a sign of cancer  
31 and fewer than 40% agreed that 'getting sunburnt more than once as a child' increased cancer risk.  
32  
33 This confirms findings from an earlier small-scale UK study [21] and suggests that awareness of skin  
34 cancer symptoms and risks among Scottish adolescents compares unfavourably with adolescents  
35 elsewhere in Europe. For example, the majority (97%) of Italian secondary school students (aged 15-  
36  
37  
38  
39  
40  
41  
42  
43  
44  
45  
46  
47  
48  
49  
50  
51  
52  
53  
54  
55  
56  
57  
58  
59  
60  
21 years) had heard of skin cancer and 66% and 59%, respectively, correctly identified sun exposure  
and sunburn as skin cancer risk factors [16]. Similarly, a study of Greek adolescents (aged 15-18  
years) found that 89% were aware of the association between sun exposure and skin cancer risk  
[17].

Adolescents also reported poor sun-protection practices with half (51%) reporting that they had  
experienced sunburn last summer. Over a third (38%) of those reporting sunburn experienced  
sunburn on more than one occasion and a tenth (10%) said that their skin went 'red, sore or

1  
2  
3 blistered'. Sunscreen use was also notably poor with almost a fifth of adolescents reporting that  
4  
5 they did not use sunscreen and less than half (47%) of those who did knew the SPF of the sunscreen  
6  
7 used. Given the causal relationship between UV exposure and incidence of malignant melanoma,[7]  
8  
9 our findings suggest that urgent action is required to reduce levels of sunburn among Scottish  
10  
11 adolescents in order to reverse rising rates of malignant melanoma.  
12

13  
14  
15  
16 In common with previous studies from the UK,[21] USA,[18] Sweden [20] and New Zealand,[19] our  
17  
18 research also identified riskier sun-related behaviour among female adolescents despite their  
19  
20 greater skin cancer symptom and risk factor awareness. Females in our study were significantly  
21  
22 more likely than males to report intentional tanning, the use of lotions or oils to aid tanning, and  
23  
24 sunburn, yet were also significantly more likely to agree that 'change in the appearance of a mole'  
25  
26 was a cancer sign and 'getting sunburnt more than once as a child' was a cancer risk factor. Indeed,  
27  
28 females who reported getting sunburnt during the previous summer were statistically significantly  
29  
30 more likely to recognise that 'change in the appearance of a mole' was a cancer sign. However,  
31  
32 compared to males, females were also significantly more likely to use sunscreen, confirming findings  
33  
34 of a systematic review that concluded that females were both more likely to adopt sun-protection  
35  
36 practices and more likely to engage in risky sun-related behaviours, and that this association was  
37  
38 most evident in adolescence and early adulthood.[26] Cognitive dissonance, denial and previous  
39  
40 personal or vicarious experience have all been identified as pivotal factors in the relationship  
41  
42 between adolescents' risk perception and risk behaviour.[27] Hence, health promotion in relation to  
43  
44 sun safe practices needs to be underpinned by greater understanding of how adolescents balance  
45  
46 harms and perceived benefits of tanning.  
47  
48  
49  
50

51  
52  
53 External influences of friends and family exerted a stronger influence on tanning attitudes than  
54  
55 associations with feeling better, more attractive, or healthier. More than two-fifths agreed that  
56  
57 most of their friends thought that a tan was a good thing, yet around a fifth said it made them feel  
58  
59  
60

1  
2  
3 better and more attractive, and around a tenth that it made them feel healthier. The primacy of  
4  
5 peer influences has also been found among similarly aged adolescents in Australasia. For example, a  
6  
7 study in New Zealand found that 42% of females and 33% of males agreed that 'most of their friends  
8  
9 think a suntan is a good thing',[19] and the majority (66%) of adolescents in an Australian study  
10  
11 perceived friends to have pro-tanning attitudes.[28] Moreover, there is evidence from a Danish  
12  
13 study that sunburn risk increases among adolescents (aged 13-17 years) whose parents hold positive  
14  
15 attitudes towards tanning,[29] and the highest ranking source of sun protection information among  
16  
17 young park-goers in London (aged 18-28 years) was 'parents and family'.[30] Further research is  
18  
19 therefore required to assess peer and family influences on Scottish adolescents' tanning attitudes in  
20  
21 order to determine the potential of peer-group and family-based interventions to reduce risky sun-  
22  
23 related behaviours.  
24  
25  
26  
27

28  
29 Females in our study were statistically significantly more likely than males to report that their friends  
30  
31 think a suntan is a good thing and that it made them feel better about themselves, healthier or more  
32  
33 attractive to others. Tanning attitudes mediate the association between skin cancer knowledge and  
34  
35 sun-related behaviour,[19,31] and more positive attitudes towards tanning among females are  
36  
37 cosmetically and socially motivated.[20] Moreover, the influence of peers on tanning attitudes is  
38  
39 known to increase as adolescents age.[19] In order to design age-appropriate sun safety  
40  
41 interventions research is therefore required to better understand how the balance between social,  
42  
43 cosmetic and health motivations changes over time, especially among young females.  
44  
45  
46  
47

#### 48 **Implications for future policy and research**

49  
50 Our research identifies an urgent need to develop sun safety interventions specifically for Scottish  
51  
52 adolescents. However, our study also suggests that further research is required to ensure  
53  
54 interventions overcome a number of challenges previously highlighted in the literature and  
55  
56 confirmed by our own research. Research is required to assess how skin cancer knowledge, sun-  
57  
58  
59  
60

1  
2  
3 related behaviour, and tanning attitudes – and the influence of peers and family on knowledge,  
4  
5 behaviour and attitudes – changes as adolescents' age. Testing behaviour change techniques [32]  
6  
7 which show promise such as those based on dissonance [33,34] to address the known discordance  
8  
9 between sun protection intention and practice,[30,35] would also be useful. This research is vital  
10  
11 because previous interventions to change sun-safe knowledge and practice have been disappointing  
12  
13 [36] and it is not known which educational techniques are most effective.[37] Despite considerable  
14  
15 challenges of effective intervention development for this age group, previous research has found  
16  
17 that school-based educational interventions to raise adolescents' cancer awareness are effective,  
18  
19 especially among females.[21,38] Hence, multi-component interventions that incorporate education  
20  
21 alongside challenges to societal beliefs around tanning (e.g., the association between tanned skin,  
22  
23 beauty and health) and environmental changes (e.g., provision of sunscreen, hats and shade in  
24  
25 secondary schools) may encourage protective sun-related behaviours. Future research identified in  
26  
27 support of intervention development has potential to have international impact on reducing the  
28  
29 burden on skin cancer.  
30  
31  
32  
33  
34

### 35 **Strengths and limitations**

36  
37 This is the first study to describe Scottish adolescents' sun-related behaviours and tanning attitudes  
38  
39 and assess associations with cancer awareness. It establishes an evidence-base to set the direction  
40  
41 of future research and policy interventions through on-going initiatives such as Detect Cancer Early  
42  
43 in Scotland and the National Awareness and Early Diagnosis Initiative (NAEDI) in England. However,  
44  
45 our study has a number of limitations. First, our sample is drawn from only one Scottish local  
46  
47 authority area (Glasgow City Council) and used purposive rather than probabilistic sampling. Thus,  
48  
49 although 2,173 adolescents from 20 (out of a possible 29) secondary schools in Glasgow were  
50  
51 surveyed, these findings may not be representative of the Scottish adolescent population. However,  
52  
53 Glasgow was purposefully selected as a research site due to known high incidence of malignant  
54  
55 melanoma in the Central Belt of Scotland, a densely populated urban region extending from Glasgow  
56  
57  
58  
59  
60



1  
2  
3 in the West to Edinburgh in the East.[2] Second, although validated instruments were used for data  
4  
5 collection, results are contingent on adolescents' accurate recall of sun-related behaviour over the  
6  
7 past year. Previous studies among adolescents have, however, found recall of sun-related  
8  
9 behaviours to be reliable and valid.[31] Finally, because data were gathered as part of a cluster  
10  
11 RCT,[22] in order to enable completion of all instruments during a 55-minute class, a shortened  
12  
13 version of an instrument to assess sun-related knowledge, behaviour and tanning attitudes[19] was  
14  
15 used which meant that replication of analysis conducted elsewhere using the full instrument could  
16  
17 not be conducted.[19] Future research is therefore required using a representative sample of  
18  
19 Scottish adolescents using the full version of the sun instrument with additional items to gather data  
20  
21 on known skin cancer risk factors to enable such analyses and more comprehensive comparison with  
22  
23 studies of similarly aged secondary school students in New Zealand [19] and Australia [28] where  
24  
25 this instrument has been used.  
26  
27  
28  
29  
30

### 31 **CONCLUSION**

32  
33 Scottish adolescents' awareness of skin cancer symptoms and risk factors was low and matched by  
34  
35 poor sun protection behaviours, most apparent in the high prevalence of (often severe) sunburn  
36  
37 during the previous summer. These findings suggest that if the continuing rise in incidence of  
38  
39 malignant melanoma in Scotland is to be halted, urgent action is required to increase skin cancer  
40  
41 awareness and promote positive sun-related behaviour among Scottish adolescents. Our study  
42  
43 highlights that the relationship between risk knowledge and risk behaviour are complex and  
44  
45 different for adolescent males and females. Thus, further research is needed to inform the  
46  
47 development of effective sun-safe interventions.  
48  
49  
50  
51  
52  
53  
54  
55  
56  
57  
58  
59  
60

## ACKNOWLEDGEMENTS

We are grateful to the adolescents who completed questionnaires, and the parents, schools, and teachers who supported this work. This independent study was funded by Teenage Cancer Trust and the Scottish Government Detect Cancer Early Programme. The views expressed are not necessarily those of Teenage Cancer Trust or the Scottish Government.

## CONTRIBUTION STATEMENT

RGK designed and conducted data analysis. GH secured funding and ethical approval. IM and GH managed school and participant recruitment, and data collection. RGK and GH wrote the first draft of the paper, and LF, RDN, REO, and SH provided critical revision for important intellectual content. All authors read and approved the final manuscript.

## FUNDING STATEMENT

This work was supported by Teenage Cancer Trust and the Scottish Government Detect Cancer Early programme.

## COMPETING INTERESTS STATEMENT

IM is employed by Teenage Cancer Trust. RGK, LF, RDN, REO, SH and GH declare that they have no conflicts of interest.

## REFERENCES

1. Thomson CS, Woolnough S, Wickenden M et al. Sunbed use in children aged 11-17 in England: face to face quota sampling surveys in the National prevalence Study and Six Cities study. *BMJ* 2010;**340**:c877.
2. Quinn M, Wood H, Cooper N, Rowan S eds. Cancer Atlas of the United Kingdom and Ireland 1991–2000 Studies on Medical and Population Subjects No. 68. London: Office for National Statistics: 2005.
3. Information Services Division (iSD). 2013 Cancer Incidence in Scotland. Edinburgh: iSD: 2011.

- 1  
2  
3 4. Gandinia S, Serab F, Cattaruzzac MS et al. Meta-analysis of risk factors for cutaneous melanoma:  
4  
5 I. Common and atypical naevi. *Eur J Cancer* 2005;**41**:28–44  
6
- 7 5. Gandinia S, Serab F, Cattaruzzac MS et al. Meta-analysis of risk factors for cutaneous melanoma:  
8  
9 III. Family history, actinic damage and phenotypic factors. *Eur J Cancer* 2005;**41**:2040-2059.  
10
- 11 6. Gandinia S, Serab F, Cattaruzzac MS et al. Meta-analysis of risk factors for cutaneous melanoma:  
12  
13 II sun exposure. *Eur. J. Cancer* 2005;**41**:45-60.  
14
- 15 7. Parkin DM, Mesher D, Sasieni P. Cancer attributable to solar (ultraviolet) radiation exposure in  
16  
17 the UK in 2010. *Br J Cancer* 2011;**105**:S66-S69.  
18
- 19 8. Cancer Research UK (CRUK). Teenage and young adult cancer incidence statistics. 2013.  
20  
21 Available online: [http://www.cancerresearchuk.org/cancer-info/cancerstats/teenage-and-](http://www.cancerresearchuk.org/cancer-info/cancerstats/teenage-and-young-adult-cancer/)  
22  
23 [young-adult-cancer/](http://www.cancerresearchuk.org/cancer-info/cancerstats/teenage-and-young-adult-cancer/)  
24  
25
- 26 9. Cancer Research UK (CRUK). Skin cancer survival statistics. 2013. Available online:  
27  
28 <http://www.cancerresearchuk.org/cancer-info/cancerstats/types/skin/survival/#source6>  
29  
30
- 31 10. Information Services Division (iSD). Trends in Cancer Survival in Scotland, 1983-2007. Edinburgh:  
32  
33 iSD: 2010.  
34
- 35 11. Betti RR, Vergani R, Tolomio E et al. Factors of delay in the diagnosis of melanoma. *Eur J*  
36  
37 *Dermatol* 2003;**13**:183-188.  
38
- 39 12. Krige JE, Isaacs S, Hudson DA et al. Delay in the diagnosis of cutaneous malignant melanoma. A  
40  
41 prospective study in 250 patients. *Cancer* 1991;**68**:2064-2068.  
42
- 43 13. Richard MA, Grob JJ, Avril MF et al. Melanoma and tumor thickness: Challenges of early  
44  
45 diagnosis. *Arch Dermatol* 1999;**135**:269-274.  
46
- 47 14. Department of Health (DH) Cancer Reform Strategy. London: DH: 2007.  
48
- 49 15. Scottish Government. Detect Cancer Early Initiative: Draft Plan. Edinburgh: Scottish  
50  
51 Government: 2011.  
52  
53  
54  
55  
56  
57  
58  
59  
60

- 1  
2  
3 16. Suppa M, Cazzaniga S, Fagnoli MC, et al. Knowledge, perceptions and behaviours about skin  
4  
5 cancer and sun protection among secondary school students from Central Italy. *J Eur Acad*  
6  
7 *Dermatol Verereol*, 2013;**27**:571-579.
- 8  
9 17. Saridi M, Toska A, Pappa V et al Knowledge, attitudes and self care practices related to sun  
10  
11 protection among teenagers in Greece. *Arch Hellenic Med* 2009;**26**:355-65.
- 12  
13 18. Knight JM, Kirincich AN, Farmer ER, et al. Awareness of the risks of tanning lamps does not  
14  
15 influence behaviour among college students. *Arch Dermatol* 2002;**138**:1311-1315.
- 16  
17 19. Wright C, Reeder AI, Gray A et al. Child sun protection: sun-related attitudes mediate the  
18  
19 association between children's knowledge and behaviours. *J Pediatr Child Health* 2008;**44**:692-  
20  
21 698.
- 22  
23 20. Sjoberg, Holm L-E, Ullen H, et al. Tanning and risk perception in adolescents. *Health, Risk and*  
24  
25 *Society* 2004;**6**:81-94.
- 26  
27 21. Kyle RG, Nicoll A, Forbat L, et al. Adolescents' awareness of cancer risk factors and associations  
28  
29 with health-related behaviours. *Health Educ Res* 2013;**28**:816-827.
- 30  
31 22. Kyle RG, Macmillan I, Rauchhaus P, et al. Adolescent Cancer Education (ACE) to increase  
32  
33 adolescent and parent cancer awareness and communication: Study protocol for a cluster  
34  
35 randomised controlled trial. *Trials* 2013;**14**:286.
- 36  
37 23. Economic and Social Research Council (ESRC): ESRC Framework for Research Ethics. Swindon:  
38  
39 ESRC: 2010.
- 40  
41 24. Cancer Research UK. Cancer Awareness Measure Toolkit V2.1. London: Cancer Research UK:  
42  
43 2011.
- 44  
45 25. Kyle RG, Forbat L, Hubbard G. Cancer awareness among adolescents in Britain: a cross-sectional  
46  
47 study. *BMC Public Health* 2012;**12**:580.
- 48  
49 26. Kasparian NA, McLoone JK, Meiser B. Skin-cancer related prevention and screening behaviours:  
50  
51 a review of the literature. *J Behav Med* 2009;**32**:406-428.
- 52  
53  
54  
55  
56  
57  
58  
59  
60

- 1  
2  
3 27. Larsman P, Eklof M, Torner M. Adolescents' risk perceptions in relation to risk behaviour with  
4  
5 long-term health consequences; antecedents and outcomes: a literature review. *Safety Science*  
6  
7 2012;**50**:1740-1748.  
8
- 9  
10 28. Volkov A, Dobbinson S, Wakefield M, et al. Seven-year trends in sun protection and sunburn  
11  
12 among Australian adolescents and adults. *Aust N Z J Public Health* 2013;**37**: 63-69.  
13
- 14 29. Behrens CL, Thorgaard C, Philip A, et al. Sunburn in children and adolescents: associations with  
15  
16 parents' behaviour and attitudes. *Scand J Public Health* 2013;**41**:302-310.  
17
- 18 30. Hedges T, Scriven A. Young park users' attitudes and behaviour to sun protection. *Glob Health*  
19  
20 *Promot* 2010;**17**:24-31.  
21
- 22 31. Andreeva VA, Reynolds KD, Buller DB, et al. Concurrent psychosocial predictors of sun safety  
23  
24 among middle school youth. *J Sch Health* 2008;**78**:374-381.  
25
- 26 32. Michie S, Richardson M, Johnston M, et al. The behaviour change taxonomy (v1) of 93  
27  
28 hierarchically clustered techniques: building an international consensus for the reporting of  
29  
30 behaviour change interventions. *Ann Behav Med* 2013;**46**:81-95.  
31
- 32 33. Freijy T, Kothe EJ. Dissonance-based interventions for health behaviour change: a systematic  
33  
34 review. *Br J Health Psychol* 2013;**18**:310-337.  
35
- 36 34. Stone J, Fernandez NC. When thinking about less failure causes more dissonance: the effect of  
37  
38 elaboration and recall on behaviour change following hypocrisy. *Social Influence* 2011;**6**:199-  
39  
40 211.  
41
- 42 35. Dobbinson SJ, Jansen K, Dixon HG, et al. Assessing population-wide behaviour change:  
43  
44 concordance of 10-year trends in self-reported and observed sun protection. *Int J Public Health*  
45  
46 2013 (Online Early) doi: 10.1007/s00038-013-0454-5  
47  
48
- 49 36. Craciun C, Schuz N, Lippke S, et al. Enhancing planning stages for sunscreen use at different  
50  
51 stages of change. *Health Educ Res* 2012;**27**:857-867.  
52  
53  
54  
55  
56  
57  
58  
59  
60

- 1  
2  
3 37. Bellamy R A. Systematic review of educational interventions for promoting sun protection  
4  
5 knowledge, attitudes and behaviour following the QUESTS approach. Med Teach 2005;**27**:269-  
6  
7 275.  
8  
9  
10 38. Kyle RG, Forbat L, Rauchhaus P et al. Increased cancer awareness among British adolescents  
11  
12 after a school-based educational intervention: a controlled before-and-after study with 6-  
13  
14 month follow-up. BMC Public Health 2013;**13**:190.  
15  
16  
17  
18  
19  
20  
21  
22  
23  
24  
25  
26  
27  
28  
29  
30

## 31 TABLES

32  
33 **Table 1:** Sample socio-demographic characteristics  
34

|                                 | n     | %      |
|---------------------------------|-------|--------|
| <i>Gender</i>                   |       |        |
| Male                            | 1,032 | 47.5   |
| Female                          | 1,102 | 50.7   |
| Missing                         | 39    | 1.8    |
| <i>Age</i>                      |       |        |
| Mean (SD)                       | 12.4  | (0.55) |
| <i>Ethnicity</i>                |       |        |
| White                           | 1,826 | 84.0   |
| Mixed                           | 75    | 3.5    |
| Asian                           | 131   | 6.0    |
| Black                           | 57    | 2.6    |
| Chinese                         | 15    | 0.7    |
| Other                           | 28    | 1.3    |
| Missing                         | 41    | 1.9    |
| <i>Knew someone with cancer</i> |       |        |
| Yes                             | 1,266 | 58.3   |
| No                              | 783   | 36.0   |
| Missing                         | 124   | 5.7    |

**Table 2:** Tanning attitudes and gender

| Statement                                                             | Female            | Male              | Significance*                                |
|-----------------------------------------------------------------------|-------------------|-------------------|----------------------------------------------|
| % Strongly agree/agree (n)                                            |                   |                   |                                              |
| Most of my friends think a suntan is a good thing.                    | <b>53.1 (554)</b> | <b>37.7 (355)</b> | $\chi^2(1, 1985)=47.48$<br><b>p&lt;0.001</b> |
| Most of my family think a suntan is a good thing.                     | 29.0 (301)        | 27.8 (260)        | $\chi^2(1, 1974)=0.36$<br>p=0.548            |
| I like to have a suntan because it makes me feel better about myself. | <b>30.8 (320)</b> | <b>18.0 (169)</b> | $\chi^2(1, 1978)=43.10$<br><b>p&lt;0.001</b> |
| A suntan makes me feel more attractive to others.                     | <b>22.7 (235)</b> | <b>18.1 (169)</b> | $\chi^2(1, 1969)=6.40$<br><b>p=0.011</b>     |
| I like to have a suntan because I feel healthier.                     | <b>16.2 (169)</b> | <b>10.1 (95)</b>  | $\chi^2(1, 1980)=15.99$<br><b>p&lt;0.001</b> |

**Notes:**

\* Pearson's  $\chi^2$  test for 2x2 tables (i.e., strongly agree/agree vs. disagree/strongly disagree/don't know). Statistically significant associations at the p<0.05 level are emboldened.

Table 3: Tanning attitudes and sun-related behaviour

| Statement                                                             | Female            |                   |                                              |                   |                   |                                             |                  |                   |                                             |
|-----------------------------------------------------------------------|-------------------|-------------------|----------------------------------------------|-------------------|-------------------|---------------------------------------------|------------------|-------------------|---------------------------------------------|
|                                                                       | Sunbathed         |                   |                                              | Sunburnt          |                   |                                             | Sunbed use       |                   |                                             |
|                                                                       | Yes               | No                | Significance*                                | Yes               | No                | Significance*                               | Yes              | No                | Significance*                               |
| % Strongly agree/agree (n)                                            |                   |                   |                                              |                   |                   |                                             |                  |                   |                                             |
| Most of my friends think a suntan is a good thing.                    | <b>61.8 (371)</b> | <b>40.6 (177)</b> | $\chi^2(1, 1036)=45.71$<br><b>p&lt;0.001</b> | <b>60.1 (370)</b> | <b>42.7 (157)</b> | $\chi^2(1, 984)=28.05$<br><b>p&lt;0.001</b> | 62.1 (41)        | 52.1 (500)        | $\chi^2(1, 1026)=2.50$<br>p=0.114           |
| Most of my family think a suntan is a good thing.                     | <b>35.7 (214)</b> | <b>19.9 (86)</b>  | $\chi^2(1, 1031)=30.44$<br><b>p&lt;0.001</b> | 31.1 (191)        | 25.6 (94)         | $\chi^2(1, 982)=3.31$<br>p=0.069            | 39.1 (25)        | 28.1 (269)        | $\chi^2(1, 1021)=3.51$<br>p=0.061           |
| I like to have a suntan because it makes me feel better about myself. | <b>42.6 (255)</b> | <b>14.5 (63)</b>  | $\chi^2(1, 1032)=93.32$<br><b>p&lt;0.001</b> | <b>38.0 (234)</b> | <b>20.6 (75)</b>  | $\chi^2(1, 980)=32.02$<br><b>p&lt;0.001</b> | 33.3 (22)        | 30.4 (291)        | $\chi^2(1, 1022)=0.24$<br>p=0.622           |
| A suntan makes me feel more attractive to others.                     | <b>31.3 (187)</b> | <b>10.9 (47)</b>  | $\chi^2(1, 1029)=59.62$<br><b>p&lt;0.001</b> | <b>26.6 (163)</b> | <b>16.4 (60)</b>  | $\chi^2(1, 979)=13.55$<br><b>p&lt;0.001</b> | 26.2 (17)        | 22.4 (213)        | $\chi^2(1, 1018)=0.50$<br>p=0.478           |
| I like to have a suntan because I feel healthier.                     | <b>23.2 (139)</b> | <b>6.9 (30)</b>   | $\chi^2(1, 1035)=48.86$<br><b>p&lt;0.001</b> | <b>18.0 (111)</b> | <b>12.4 (46)</b>  | $\chi^2(1, 986)=5.40$<br><b>p=0.020</b>     | 19.7 (13)        | 15.6 (150)        | $\chi^2(1, 1025)=0.76$<br>p=0.383           |
|                                                                       | Male              |                   |                                              |                   |                   |                                             |                  |                   |                                             |
|                                                                       | Sunbathed         |                   |                                              | Sunburnt          |                   |                                             | Sunbed use       |                   |                                             |
|                                                                       | Yes               | No                | Significance*                                | Yes               | No                | Significance*                               | Yes              | No                | Significance*                               |
| % Strongly agree/agree (n)                                            |                   |                   |                                              |                   |                   |                                             |                  |                   |                                             |
| Most of my friends think a suntan is a good thing.                    | <b>54.8 (154)</b> | <b>30.3 (197)</b> | $\chi^2(1, 932)=50.36$<br><b>p&lt;0.001</b>  | <b>41.9 (195)</b> | <b>34.5 (143)</b> | $\chi^2(1, 880)=5.18$<br><b>p=0.023</b>     | 37.9 (22)        | 38.0 (325)        | $\chi^2(1, 914)=0.00$<br>p=0.996            |
| Most of my family think a suntan is a good thing.                     | <b>43.5 (121)</b> | <b>21.1 (137)</b> | $\chi^2(1, 926)=48.49$<br><b>p&lt;0.001</b>  | 30.3 (139)        | 25.2 (104)        | $\chi^2(1, 876)=2.55$<br>p=0.110            | <b>39.7 (23)</b> | <b>26.4 (225)</b> | $\chi^2(1, 909)=4.78$<br><b>p=0.029</b>     |
| I like to have a suntan because it makes me feel better about myself. | <b>32.9 (91)</b>  | <b>11.7 (76)</b>  | $\chi^2(1, 928)=59.06$<br><b>p&lt;0.001</b>  | <b>21.6 (100)</b> | <b>13.8 (57)</b>  | $\chi^2(1, 876)=9.02$<br><b>p=0.003</b>     | <b>29.3 (17)</b> | <b>17.0 (145)</b> | $\chi^2(1, 911)=5.63$<br><b>p=0.018</b>     |
| A suntan makes me feel more attractive to others.                     | <b>32.1 (88)</b>  | <b>12.2 (79)</b>  | $\chi^2(1, 924)=51.88$<br><b>p&lt;0.001</b>  | 20.0 (93)         | 15.9 (66)         | $\chi^2(1, 880)=2.59$<br>p=0.108            | <b>30.9 (17)</b> | <b>17.1 (145)</b> | $\chi^2(1, 905)=6.74$<br><b>p=0.009</b>     |
| I like to have a suntan because I feel healthier.                     | <b>19.8 (54)</b>  | <b>5.8 (38)</b>   | $\chi^2(1, 928)=42.16$<br><b>p&lt;0.001</b>  | <b>12.0 (56)</b>  | <b>7.2 (30)</b>   | $\chi^2(1, 884)=5.88$<br><b>p=0.015</b>     | <b>25.0 (14)</b> | <b>9.0 (77)</b>   | $\chi^2(1, 926)=14.88$<br><b>p&lt;0.001</b> |

Notes:  
 \* Pearson's  $\chi^2$  test for 2x2 tables (i.e., Strongly agree/agree vs. Strongly disagree/disagree/neither agree or disagree/don't know). Statistically significant associations at the p<0.05 level are emboldened.



**Table 4:** Associations between sun-related behaviour and cancer awareness

| Symptom:<br>'change in the appearance of a mole'<br>% Yes (n)                              | Sunbathed  |            |                                   | Sunburnt          |                   |                                                           | Sunbed use |            |                                   |
|--------------------------------------------------------------------------------------------|------------|------------|-----------------------------------|-------------------|-------------------|-----------------------------------------------------------|------------|------------|-----------------------------------|
|                                                                                            | Yes        | No         | Significance*                     | Yes               | No                | Significance*                                             | Yes        | No         | Significance*                     |
| Female                                                                                     | 50.1 (304) | 46.0 (204) | $\chi^2(1, 1050)=1.67$<br>p=0.197 | <b>51.0 (317)</b> | <b>44.1 (163)</b> | <b><math>\chi^2(1, 991)=4.54</math></b><br><b>p=0.033</b> | 55.4 (36)  | 47.6 (461) | $\chi^2(1, 1033)=1.47$<br>p=0.225 |
| Male                                                                                       | 43.8 (127) | 43.1 (289) | $\chi^2(1, 960)=0.036$<br>p=0.850 | 44.6 (210)        | 41.9 (178)        | $\chi^2(1, 896)=0.67$<br>p=0.415                          | 36.2 (21)  | 44.1 (386) | $\chi^2(1, 934)=1.37$<br>p=0.243  |
| Risk factor: 'getting sunburnt more<br>than once as a child'<br>% Strongly agree/agree (n) | Sunbathed  |            |                                   | Sunburnt          |                   |                                                           | Sunbed use |            |                                   |
|                                                                                            | Yes        | No         | Significance*                     | Yes               | No                | Significance*                                             | Yes        | No         | Significance*                     |
| Female                                                                                     | 43.9 (265) | 42.4 (186) | $\chi^2(1, 1043)=0.24$<br>p=0.628 | 44.5 (276)        | 41.3 (151)        | $\chi^2(1, 986)=1.00$<br>p=0.318                          | 36.4 (24)  | 43.9 (422) | $\chi^2(1, 1027)=1.43$<br>p=0.231 |
| Male                                                                                       | 38.9 (112) | 37.4 (244) | $\chi^2(1, 941)=0.20$<br>p=0.657  | 40.8 (189)        | 34.6 (144)        | $\chi^2(1, 879)=3.59$<br>p=0.058                          | 41.1 (23)  | 37.5 (321) | $\chi^2(1, 913)=0.29$<br>p=0.589  |

Notes:

\* Pearson's  $\chi^2$  test for 2x2 tables (i.e., Symptom: Yes vs. No/Don't know; Risk factor: Strongly agree/agree vs. Strongly disagree/disagree/neither agree or disagree/don't know). Statistically significant associations at the p<0.05 level are emboldened.

STROBE 2007 (v4) Statement—Checklist of items that should be included in reports of *cross-sectional studies*

| Section/Topic             | Item # | Recommendation                                                                                                                                                                       | Reported on page # |
|---------------------------|--------|--------------------------------------------------------------------------------------------------------------------------------------------------------------------------------------|--------------------|
| Title and abstract        | 1      | (a) Indicate the study’s design with a commonly used term in the title or the abstract                                                                                               | 1                  |
|                           |        | (b) Provide in the abstract an informative and balanced summary of what was done and what was found                                                                                  | 2                  |
| <b>Introduction</b>       |        |                                                                                                                                                                                      |                    |
| Background/rationale      | 2      | Explain the scientific background and rationale for the investigation being reported                                                                                                 | 4 to 5             |
| Objectives                | 3      | State specific objectives, including any prespecified hypotheses                                                                                                                     | 5                  |
| <b>Methods</b>            |        |                                                                                                                                                                                      |                    |
| Study design              | 4      | Present key elements of study design early in the paper                                                                                                                              | 5 to 8             |
| Setting                   | 5      | Describe the setting, locations, and relevant dates, including periods of recruitment, exposure, follow-up, and data collection                                                      | 6                  |
| Participants              | 6      | (a) Give the eligibility criteria, and the sources and methods of selection of participants                                                                                          | 6                  |
| Variables                 | 7      | Clearly define all outcomes, exposures, predictors, potential confounders, and effect modifiers. Give diagnostic criteria, if applicable                                             | 6 to 7             |
| Data sources/ measurement | 8*     | For each variable of interest, give sources of data and details of methods of assessment (measurement). Describe comparability of assessment methods if there is more than one group | 6 to 7             |
| Bias                      | 9      | Describe any efforts to address potential sources of bias                                                                                                                            | 15                 |
| Study size                | 10     | Explain how the study size was arrived at                                                                                                                                            | 6                  |
| Quantitative variables    | 11     | Explain how quantitative variables were handled in the analyses. If applicable, describe which groupings were chosen and why                                                         | 7                  |
| Statistical methods       | 12     | (a) Describe all statistical methods, including those used to control for confounding                                                                                                | 8                  |
|                           |        | (b) Describe any methods used to examine subgroups and interactions                                                                                                                  | 8                  |
|                           |        | (c) Explain how missing data were addressed                                                                                                                                          | 7                  |
|                           |        | (d) If applicable, describe analytical methods taking account of sampling strategy                                                                                                   | N/A                |
|                           |        | (e) Describe any sensitivity analyses                                                                                                                                                | N/A                |
| <b>Results</b>            |        |                                                                                                                                                                                      |                    |

1  
2  
3  
4  
5  
6  
7  
8  
9  
10  
11  
12  
13  
14  
15  
16  
17  
18  
19  
20  
21  
22  
23  
24  
25  
26  
27  
28  
29  
30  
31  
32  
33  
34  
35  
36  
37  
38  
39  
40  
41  
42  
43  
44  
45  
46  
47  
48  
49

|                          |     |                                                                                                                                                                                                              |               |
|--------------------------|-----|--------------------------------------------------------------------------------------------------------------------------------------------------------------------------------------------------------------|---------------|
| Participants             | 13* | (a) Report numbers of individuals at each stage of study—eg numbers potentially eligible, examined for eligibility, confirmed eligible, included in the study, completing follow-up, and analysed            | 8             |
|                          |     | (b) Give reasons for non-participation at each stage                                                                                                                                                         | 6             |
|                          |     | (c) Consider use of a flow diagram                                                                                                                                                                           | N/A           |
| Descriptive data         | 14* | (a) Give characteristics of study participants (eg demographic, clinical, social) and information on exposures and potential confounders                                                                     | 8 and Table 1 |
|                          |     | (b) Indicate number of participants with missing data for each variable of interest                                                                                                                          | 8 and Table 1 |
| Outcome data             | 15* | Report numbers of outcome events or summary measures                                                                                                                                                         | 9 to 12       |
| Main results             | 16  | (a) Give unadjusted estimates and, if applicable, confounder-adjusted estimates and their precision (eg, 95% confidence interval). Make clear which confounders were adjusted for and why they were included | 9 to 12       |
|                          |     | (b) Report category boundaries when continuous variables were categorized                                                                                                                                    | N/A           |
|                          |     | (c) If relevant, consider translating estimates of relative risk into absolute risk for a meaningful time period                                                                                             | N/A           |
| Other analyses           | 17  | Report other analyses done—eg analyses of subgroups and interactions, and sensitivity analyses                                                                                                               | 9 to 12       |
| <b>Discussion</b>        |     |                                                                                                                                                                                                              |               |
| Key results              | 18  | Summarise key results with reference to study objectives                                                                                                                                                     | 12 to 14      |
| Limitations              | 19  | Discuss limitations of the study, taking into account sources of potential bias or imprecision. Discuss both direction and magnitude of any potential bias                                                   | 15 to 16      |
| Interpretation           | 20  | Give a cautious overall interpretation of results considering objectives, limitations, multiplicity of analyses, results from similar studies, and other relevant evidence                                   | 12 to 14      |
| Generalisability         | 21  | Discuss the generalisability (external validity) of the study results                                                                                                                                        | 15            |
| <b>Other information</b> |     |                                                                                                                                                                                                              |               |
| Funding                  | 22  | Give the source of funding and the role of the funders for the present study and, if applicable, for the original study on which the present article is based                                                | 3             |

\*Give information separately for cases and controls in case-control studies and, if applicable, for exposed and unexposed groups in cohort and cross-sectional studies.

**Note:** An Explanation and Elaboration article discusses each checklist item and gives methodological background and published examples of transparent reporting. The STROBE checklist is best used in conjunction with this article (freely available on the Web sites of PLoS Medicine at <http://www.plosmedicine.org/>, Annals of Internal Medicine at <http://www.annals.org/>, and Epidemiology at <http://www.epidem.com/>). Information on the STROBE Initiative is available at [www.strobe-statement.org](http://www.strobe-statement.org).

# BMJ Open

## Scottish adolescents' sun-related behaviours, tanning attitudes and associations with skin cancer awareness: a cross-sectional study

|                                 |                                                                                                                                                                                                                                                                                                                                                                                                                                                             |
|---------------------------------|-------------------------------------------------------------------------------------------------------------------------------------------------------------------------------------------------------------------------------------------------------------------------------------------------------------------------------------------------------------------------------------------------------------------------------------------------------------|
| Journal:                        | <i>BMJ Open</i>                                                                                                                                                                                                                                                                                                                                                                                                                                             |
| Manuscript ID:                  | bmjopen-2014-005137.R1                                                                                                                                                                                                                                                                                                                                                                                                                                      |
| Article Type:                   | Research                                                                                                                                                                                                                                                                                                                                                                                                                                                    |
| Date Submitted by the Author:   | 09-Apr-2014                                                                                                                                                                                                                                                                                                                                                                                                                                                 |
| Complete List of Authors:       | Kyle, Richard; University of Stirling, School of Nursing, Midwifery and Health<br>MacMillan, Iona; Teenage Cancer Trust,<br>Forbat, Liz; University of Stirling, School of Nursing, Midwifery and Health<br>Neal, Richard; Bangor University, North Wales Centre for Primary Care Research<br>Haw, Sally; University of Stirling, School of Nursing, Midwifery and Health<br>Hubbard, Gill; University of Stirling, School of Nursing, Midwifery and Health |
| <b>Primary Subject Heading</b>: | Public health                                                                                                                                                                                                                                                                                                                                                                                                                                               |
| Secondary Subject Heading:      | Oncology                                                                                                                                                                                                                                                                                                                                                                                                                                                    |
| Keywords:                       | PUBLIC HEALTH, Paediatric oncology < ONCOLOGY, Epidemiology < ONCOLOGY                                                                                                                                                                                                                                                                                                                                                                                      |
|                                 |                                                                                                                                                                                                                                                                                                                                                                                                                                                             |

SCHOLARONE™  
Manuscripts

only

1  
2  
3 **SCOTTISH ADOLESCENTS' SUN-RELATED BEHAVIOURS, TANNING ATTITUDES AND**  
4  
5 **ASSOCIATIONS WITH SKIN CANCER AWARENESS: A CROSS-SECTIONAL STUDY**  
6  
7  
8

9  
10 Richard G Kyle\*<sup>1</sup>

11 Iona Macmillan<sup>2</sup>

12 Liz Forbat<sup>1</sup>

13 Richard D Neal<sup>3</sup>

14 Ronan E O'Carroll<sup>4</sup>

15 Sally Haw<sup>5</sup>

16 Gill Hubbard<sup>1</sup>

17  
18  
19  
20  
21  
22  
23  
24  
25  
26  
27 <sup>1</sup> Cancer Care Research Centre, School of Nursing, Midwifery and Health, University of Stirling,  
28 Stirling, UK, FK9 4LA

29  
30  
31 <sup>2</sup> Teenage Cancer Trust, 93 Newman Street, London, UK, W1T 3EZ

32  
33 <sup>3</sup> North Wales Centre for Primary Care Research, Bangor University, Bangor, UK, LL13 7YP

34  
35 <sup>4</sup> Division of Psychology, School of Natural Sciences, University of Stirling, Stirling, UK, FK9 4LA

36  
37 <sup>5</sup> School of Nursing, Midwifery and Health, University of Stirling, Stirling, UK, FK9 4LA

38  
39  
40  
41  
42 \* Corresponding author

43 Email: richard.kyle@stir.ac.uk

44  
45 Telephone: +44(0)1463 255623  
46  
47  
48  
49  
50  
51  
52  
53  
54  
55  
56  
57  
58  
59  
60

**ABSTRACT**

**Objectives:** To describe Scottish adolescents' sun-related behaviours and tanning attitudes and assess associations with skin cancer awareness.

**Design:** Cross-sectional study.

**Setting:** 20 state secondary schools in one Scottish local authority (Glasgow City).

**Participants:** 2,173 adolescents (female: 50.7%, n=1,102) with a mean age of 12.4 (Standard Deviation = 0.55).

**Outcome measures:** Sun-related behaviour (suntan, sunbathing, sunburn, sunscreen use, sunbed use), tanning attitudes, skin cancer-related symptom and risk factor awareness.

**Results:** Adolescents reported poor sun-related practice: 51% of adolescents reported sunburn the previous summer and 38% indicated sunburn on more than one occasion. Skin cancer awareness was low: 45% recognised 'change in the appearance of a mole' as a cancer symptom, and 39% agreed that 'getting sunburnt more than once as a child' increased cancer risk. 42% and 26% of adolescents, respectively, reported that friends and family held pro-tanning attitudes. Compared to males, females were statistically significantly more likely to: report sunbathing ( $p<0.001$ ), use of lotions or oil to aid tanning ( $p<0.001$ ), and sunburn ( $p<0.001$ ); know that changes in the appearance of a mole was a skin cancer symptom ( $p=0.036$ ) and sunburn more than once as a child was a skin cancer risk factor ( $p=0.005$ ); perceive their friends to hold pro-tanning attitudes ( $p<0.001$ ) and indicate that a tan made them feel better about themselves ( $p<0.001$ ), more attractive to others ( $p=0.011$ ) and healthier ( $p<0.001$ ).

**Conclusions:** Scottish adolescents had poor sun protection practice and low skin cancer awareness. Girls adopted riskier sun-related behaviour despite greater awareness of skin cancer-related risk. Urgent action is required to promote positive sun-related behaviour and increase skin cancer awareness among Scottish adolescents. However, further research is needed to inform the development of effective sun-safe interventions.

**STRENGTHS AND LIMITATIONS OF THIS STUDY**

- This is the first study to describe Scottish adolescents' sun-related behaviours and tanning attitudes and assess associations with malignant melanoma symptom and risk factor awareness.
- Findings establish evidence to support on-going government initiatives to increase the proportion of people with early diagnosis, including Detect Cancer Early (DCE) in Scotland and the National Awareness and Early Diagnosis Initiative (NAEDI) in England.
- Adolescents in only one Scottish local authority area were surveyed and non-probabilistic sampling was used, although Glasgow was purposefully selected due to known high incidence of malignant melanoma in the Central Belt of Scotland, a densely populated urban region extending from Glasgow in the West to Edinburgh in the East.

**KEYWORDS**

Malignant melanoma, skin cancer, tanning attitudes, sunburn, sunbeds, sun protection, health-related behaviour, health promotion

**WORD COUNT**

3,586

## INTRODUCTION

Rates of malignant melanoma are rising more rapidly than for any other cancer in the United Kingdom (UK) [1] and Scotland has above average incidence when compared to the rest of the UK.[2] Incidence of malignant melanoma in Scotland significantly increased by 51.4% ( $p < 0.0001$ ) over the past decade.[3] Light skin colour, blonde or red hair, number of moles,[4] family history,[5] and excess exposure to ultraviolet radiation, particularly in childhood, are the main risk factors for malignant melanoma.[6] It is estimated that 86% of malignant melanoma cases in the UK can be attributable to excess exposure to UV radiation (Male = 90%, Female = 82%), and that these proportions are “very much greater at younger ages”.[7]

Malignant melanoma is the fifth most common teenage and young adult (TYA) cancer in the UK, accounting for 11% of the 2,200 average annual cases among those aged 15-24.[8] Almost twice as many females ( $n=153$ ) than males ( $n=73$ ) are diagnosed with malignant melanoma annually, making it the third and sixth most common cancer in young women and men, respectively.[8] Incidence of malignant melanoma significantly increased by 32% among young females between 1995 and 2009.[8]

Across the UK survival rates for malignant melanoma are high and increasing over time,[9] and in Scotland five-year survival rates rose by 21% over the past 20 years, from 64% in the period 1983-97 to 85% in 2003-07.[10] Survival is higher in younger people[10] and there is some evidence that longer time durations prior to diagnosis may be associated with poorer outcomes.[11-13] UK government health departments are therefore committed to improving awareness as part of a strategy to increase the proportion of people with early diagnosis.[14,15] Increasing adolescents' awareness of skin cancer risk associated with UV exposure and encouraging sun protective practices may therefore have potential to reduce the burden of malignant melanoma both in adolescence and early adulthood, as well as later life through the establishment of protective health-related



1  
2  
3 behaviours. However, previous research has found that although adolescents' awareness of skin  
4  
5 cancer and its association with UV exposure is generally good [16,17] this knowledge does not  
6  
7 translate into sun-safe behaviour,[18,19] especially among young females.[19-21]  
8  
9

10  
11  
12 Little evidence exists around the association between sun-related behaviours and cancer awareness  
13  
14 among adolescents in the UK. Only one UK study to date has examined the association between  
15  
16 sunscreen and sunbed use and cancer awareness, which found that female adolescents who used  
17  
18 sunbeds were statistically significantly more likely to agree that UV exposure was a cancer risk  
19  
20 factor.[21] Moreover, patterns of sun-related behaviours (i.e., sunbathing, sunburn) and protective  
21  
22 practices (i.e., sunscreen use) and tanning attitudes among Scottish adolescents have not previously  
23  
24 been described. This lack of evidence hampers development of interventions to increase cancer  
25  
26 awareness and change sun-related behaviours in support of government initiatives. Hence, the aims  
27  
28 of this study were to: 1) describe the sun-related behaviours and tanning attitudes among Scottish  
29  
30 adolescents; and 2) assess associations between sun-related behaviour, tanning attitudes and cancer  
31  
32 awareness.  
33  
34  
35  
36  
37

## 38 **METHODS**

### 39 **Study design**

40  
41 Data are drawn from the Adolescent Cancer Education (ACE) study, the design of which is described  
42  
43 in the published protocol.[22] Briefly, ACE is a cluster randomised controlled trial (RCT) to assess the  
44  
45 effectiveness of a school-based educational intervention on adolescents' and parents' cancer  
46  
47 awareness and communication. Data were collected at three time-points: baseline (prior to  
48  
49 intervention delivery), and at two-weeks, and six-month follow-up. This paper reports cross-  
50  
51 sectional analysis of baseline data.  
52  
53  
54  
55  
56  
57  
58  
59  
60

### Setting and Sample

All 29 state secondary schools (excluding schools for adolescents with special educational needs) in the Glasgow City Council area were invited to participate. Recruitment ended when the (pragmatic) target of 20 schools (69.0%) agreed to participate. All 3,223 adolescents on the school register at the end of their first year (S1) of secondary education (age 12/13 years) in study schools were invited to participate in the study, of which 2,173 (67.4%) consented to data collection.

### Recruitment and consent

Schools were recruited in May 2013 and adolescents in June 2013. School head teachers were contacted by letter, which was followed up with a telephone call and face-to-face meeting to invite participation in the study. Parents/carers were sent a letter and information sheet about the study, which included a form to be returned to school if they wished to opt their child out of the study. The opt-out method of parental consent has been found to be ethically acceptable.[23] Adolescents were provided with an information sheet at the time measurements were undertaken and also asked to give written consent to their participation in the study.

### Survey instrument

Data were collected in June 2013 (i.e., northern hemisphere summer) using a self-complete paper questionnaire administered by teachers to a whole class under exam conditions but students were informed that it was not a test. Teachers encouraged students to complete as much of the questionnaire as they could within the 50 or 55 minute lesson period.

The instrument incorporated validated questions on adolescents' sun-related behaviours and tanning attitudes,[19] the Cancer Awareness Measure (CAM),[24,25] and socio-demographic questions.

### *Sun-related behaviours and tanning attitudes*

Adolescents' tanning attitudes and sun-related behaviours were assessed using items from an instrument developed in New Zealand.[19] Sun-related behaviours, including sunbathing, getting a suntan, use of sun beds and sun-protection practices during the previous summer (i.e., 2012) or past 12 months were assessed through ten questions. Attitudes towards tanning were assessed through five statements which used a five-point Likert scale to ask adolescents if a suntan made them 'feel healthier', 'more attractive to others' or 'better about themselves', and if friends and family thought that a suntan was a 'good thing'. For analysis, responses were dichotomised (i.e., 'yes' versus 'no'; 'strongly agree'/'agree' versus 'neither agree nor disagree'/'disagree'/'strongly disagree').

### *Skin cancer symptom and risk factor awareness*

Adolescents' awareness of skin cancer related symptoms and risk factors were assessed through two questions in the CAM. Awareness of the cancer sign 'change in the appearance in a mole' was assessed alongside eight other cancer signs and symptoms through a recognition question. Awareness of the skin cancer-related risk factor 'getting sunburnt more than once as a child' was assessed alongside ten other cancer risk factors on a five-point Likert scale. In accordance with previous practice,[21,25] responses were dichotomised for analysis (i.e., mole: 'Yes' versus 'No'/'Don't know'; sunburn: 'strongly agree'/'agree' versus 'not sure'/'disagree'/'strongly disagree').

### *Socio-demographic characteristics*

Socio-demographic questions were included to gather data on: age, gender, ethnicity, and whether the student had been diagnosed or knew a relative or friend who had been diagnosed with any cancer.

### Data analysis

Descriptive statistics were calculated for demographic variables (i.e., age, gender, ethnicity, knowing someone with cancer), sun-related behaviours and tanning attitudes, and skin cancer related symptom and risk factor awareness. Pearson's chi-square ( $\chi^2$ ) tests were used to assess associations between: (1) sun-related behaviours and gender; (2) tanning attitudes and gender and sun-related behaviour; (3) skin cancer-related symptom and risk factor awareness and gender, sun-related behaviours, and tanning attitudes. Data were analysed using SPSS 19.0. Significance tests were two-sided;  $p < 0.05$  was considered statistically significant.

### Ethical considerations

Approval for the study was obtained from the Research Ethics Committee in the School of Nursing, Midwifery and Health, University of Stirling (reference: 13/14(83)). Glasgow City Council, Planning, Performance and Research Unit approved the involvement of secondary schools. All General Practitioner (GP) practices in the research site were informed about the study.

## RESULTS

### Sample

The sample included 2,173 (female:  $n=1,102$ , 50.7%) adolescents with a mean age of 12.4 (Standard Deviation [SD] = 0.55) at the time of the survey. Socio-demographic characteristics of respondents are shown in Table 1.

*[Insert Table 1 here]*

### Sun-related behaviours

#### *Suntan*

Around two-thirds (61.3%, n=1,333) of adolescents reported getting a suntan last summer. Slightly more girls than boys reported a suntan, although this difference was not statistically significant (Girls: 66.2% [n=700], Boys: 63.4% [n=616];  $\chi^2(1, 2030)=1.73, p=0.189$ ).

#### *Sunbathing*

Four in ten (42.2%, n=916) adolescents reported sunbathing regularly last summer to try to get a tan. Girls were statistically significantly more likely to report sunbathing (Girls: 57.8% [n=611], Boys: 30.4% [n=294];  $\chi^2(1, 2025)=152.86, p<0.001$ ). Of those who sunbathed, 44.2% (n=405) reported using oils or lotions to aid tanning. Girls who sunbathed were statistically significantly more likely than boys to report using oils or lotions to help get a tan (Girls: 47.4% [n=289], Boys: 38.1% [n=111];  $\chi^2(1, 901)=6.80, p=0.009$ ).

#### *Sunburn*

Half of adolescents (51.2%, n=1,112) reported getting sunburnt last summer, of whom around two-thirds (61.7%, n=686) reported getting sunburnt on one occasion, and over a third (38.3%, n=426) reported getting sunburnt on more than one occasion. Girls were statistically significantly more likely to report getting sunburnt last summer (Girls: 62.6% [n=625], Boys: 52.7% [n=476];  $\chi^2(1, 1902)=19.34, p<0.001$ ). Of girls who reported getting sunburnt (n=625), almost 1 in 10 (8.2%, n=51) said that their 'skin went red, sore and blistered', nearly 4 in 10 (39.0%, n=244) said their 'skin went red and sore'; 24.0% (n=150) reported their 'skin went red but not sore' and 27.7% (n=173) said their 'skin went pink or slightly red'. A greater proportion of boys than girls reported 'red, sore and blistered skin' (11.3%, n=54), although fewer reported that their 'skin went red and sore' (34.2%, n=163); 24.4% (n=116) reported their 'skin went red but not sore', and 27.9% (n=133) said their 'skin went pink or slightly red'.

### *Sunscreen use*

Nearly a fifth of adolescents (16.8%, n=365) reported that they 'didn't usually use sunscreen'. Of those who reported using sunscreen (74.0%, n=1609), over half (52.6%, n=847) did not know the Sun Protection Factor (SPF) of the sunscreen they usually used. The greatest proportion of adolescents who could identify the SPF of their sunscreen used SPF >30 (19.7%, n=317), followed by: SPF30 (15.2%, n=244); SPF15 (8.0%, n=129), and SPF <15 (4.5%, n=72).

Of those who reported getting sunburnt (51.2%, n=1,112), 1 in 10 (11.6%, n=129) reported that they did not use sunscreen. Boys who got sunburnt were statistically significantly more likely to report not using sunscreen, with over 1 in 4 reporting that they did not use sunscreen (Boys: 27.9% [n=72], Girls: 15.4% [n=57];  $\chi^2(1, 629)=14.69, p<0.001$ ).

### *Sunbed use*

1 in 20 (5.8%, n=127) adolescents reported using a sunbed in the last 12 months. There was no statistically significant gender difference in sunbed use (Girls: 6.3% [n=66], Boys: 6.3% [n=59];  $\chi^2(1, 1980)=0.003, p=0.959$ ).

### **Tanning attitudes**

Peers exerted the greatest influence on adolescents' attitudes towards tanning with two-fifths (42.3%, n=918) stating that they strongly agreed or agreed with the statement 'most of my friends think a suntan is a good thing'. A quarter of adolescents (26.1%, n=567) agreed that their family thought a suntan was a good thing. A fifth of adolescents agreed that a suntan made them feel better about themselves (22.7%, n=492) and that a suntan made them feel more attractive to others (18.8%, n=409). A tenth (12.3%, n=267) agreed that they liked to have a suntan because it made them feel healthier. Gender differences were investigated and are summarised in Table 2.

1  
2  
3 [Insert Table 2 here]  
4  
5  
6

7 Adolescents of both sexes who reported sunbathing were statistically significantly more likely to  
8 agree with each of the five tanning attitude statements than those who did not report sunbathing  
9 (Table 3). Boys who reported using sunbeds were statistically significantly more likely to agree with  
10 four of the five statements, the exception being the statement 'most of my friends think a suntan is  
11 a good thing' for which there was no difference between boys who did and did not report sunbed  
12 use (Table 3).  
13  
14  
15  
16  
17  
18  
19

20  
21  
22 [Insert Table 3 here]  
23  
24  
25  
26

## 27 Sun-related behaviour and cancer awareness

### 28 Symptom awareness

29 Less than half (45.2%, n=982) of adolescents thought that change in the appearance of a mole could  
30 be a sign of cancer. Girls were statistically significantly more likely to recognise that a change in the  
31 appearance of a mole was potentially a sign of cancer (Girls: 48.0% [n=524]; Boys: 43.5% [n=444];  
32  $\chi^2(1, 2112)=4.38, p=0.036$ ).  
33  
34  
35  
36  
37  
38  
39

40  
41 The only statistically significant association between symptom awareness and sun-related behaviour  
42 was among females who reported getting sunburnt, who were more likely to agree that a change in  
43 the appearance of a mole was potentially a sign of cancer (Table 4).  
44  
45  
46  
47  
48

### 49 Risk factor awareness

50  
51 Four in ten (39.1%, n=849) adolescents thought that getting sunburnt more than once as a child was  
52 a risk factor of cancer. Girls were statistically significantly more likely to agree that getting sunburnt  
53  
54  
55  
56  
57  
58  
59  
60

1  
2  
3 more than once as a child was a cancer risk factor (Girls: 43.4% [n=469]; Boys: 37.3% [n=370];  $\chi^2(1,$   
4  
5 2071)=7.95, p=0.005).  
6  
7

8  
9  
10 There were no statistically significant associations between awareness of getting sunburnt more  
11  
12 than once as a child and sun-related behaviours, although adolescents of both sexes who reported  
13  
14 getting sunburnt were more likely to agree that sunburn was a cancer risk factor (Table 4).  
15

16  
17  
18 *[Insert Table 4 here]*  
19

## 20 21 22 **DISCUSSION**

23  
24 Scottish adolescents' awareness of the symptoms and risk factors associated with skin cancer was  
25  
26 low: less than half of adolescents identified 'change in the appearance of a mole' as a sign of cancer  
27  
28 and fewer than 40% agreed that 'getting sunburnt more than once as a child' increased cancer risk.  
29  
30 This confirms findings from an earlier small-scale UK study [21] and suggests that awareness of skin  
31  
32 cancer symptoms and risks among Scottish adolescents compares unfavourably with adolescents  
33  
34 elsewhere in Europe. For example, the majority (97%) of Italian secondary school students (aged 15-  
35  
36 21 years) had heard of skin cancer and 66% and 59%, respectively, correctly identified sun exposure  
37  
38 and sunburn as skin cancer risk factors [16]. Similarly, a study of Greek adolescents (aged 15-18  
39  
40 years) found that 89% were aware of the association between sun exposure and skin cancer risk  
41  
42 [17].  
43  
44  
45

46  
47  
48 Adolescents also reported poor sun-protection practices with half (51%) reporting that they had  
49  
50 experienced sunburn last summer. Over a third (38%) of those reporting sunburn experienced  
51  
52 sunburn on more than one occasion and a tenth (10%) said that their skin went 'red, sore or  
53  
54 blistered'. Sunscreen use was also notably poor with almost a fifth of adolescents reporting that  
55  
56 they did not use sunscreen and less than half (47%) of those who did knew the SPF of the sunscreen  
57  
58  
59  
60



1  
2  
3 used. Given the causal relationship between UV exposure and incidence of malignant melanoma,[7]  
4  
5 our findings suggest that urgent action is required to reduce levels of sunburn among Scottish  
6  
7 adolescents in order to reverse rising rates of malignant melanoma.  
8  
9

10  
11 In common with previous studies from the UK,[21] USA,[18] Sweden [20] and New Zealand,[19] our  
12  
13 research also identified riskier sun-related behaviour among female adolescents despite their  
14  
15 greater skin cancer symptom and risk factor awareness. Females in our study were significantly  
16  
17 more likely than males to report intentional tanning, the use of lotions or oils to aid tanning, and  
18  
19 sunburn, yet were also significantly more likely to agree that 'change in the appearance of a mole'  
20  
21 was a cancer sign and 'getting sunburnt more than once as a child' was a cancer risk factor. Indeed,  
22  
23 females who reported getting sunburnt during the previous summer were statistically significantly  
24  
25 more likely to recognise that 'change in the appearance of a mole' was a cancer sign. However,  
26  
27 compared to males, females were also significantly more likely to use sunscreen, confirming findings  
28  
29 of a systematic review that concluded that females were both more likely to adopt sun-protection  
30  
31 practices and more likely to engage in risky sun-related behaviours, and that this association was  
32  
33 most evident in adolescence and early adulthood.[26] Cognitive dissonance, denial and previous  
34  
35 personal or vicarious experience have all been identified as pivotal factors in the relationship  
36  
37 between adolescents' risk perception and risk behaviour.[27] Hence, health promotion in relation to  
38  
39 sun safe practices needs to be underpinned by greater understanding of how adolescents balance  
40  
41 harms and perceived benefits of tanning.  
42  
43  
44  
45  
46  
47

48  
49 External influences of friends and family exerted a stronger influence on tanning attitudes than  
50  
51 associations with feeling better, more attractive, or healthier. More than two-fifths agreed that  
52  
53 most of their friends thought that a tan was a good thing, yet around a fifth said it made them feel  
54  
55 better and more attractive, and around a tenth that it made them feel healthier. The primacy of  
56  
57 peer influences has also been found among similarly aged adolescents in Australasia. For example, a  
58  
59  
60

1  
2  
3 study in New Zealand found that 42% of females and 33% of males agreed that 'most of their friends  
4 think a suntan is a good thing',[19] and the majority (66%) of adolescents in an Australian study  
5 perceived friends to have pro-tanning attitudes.[28] Moreover, there is evidence from a Danish  
6 study that sunburn risk increases among adolescents (aged 13-17 years) whose parents hold positive  
7 attitudes towards tanning,[29] and the highest ranking source of sun protection information among  
8 young park-goers in London (aged 18-28 years) was 'parents and family'.[30] Further research is  
9 therefore required to assess peer and family influences on Scottish adolescents' tanning attitudes in  
10 order to determine the potential of peer-group and family-based interventions to reduce risky sun-  
11 related behaviours.  
12  
13  
14  
15  
16  
17  
18  
19  
20  
21  
22  
23

24 Females in our study were statistically significantly more likely than males to report that their friends  
25 think a suntan is a good thing and that it made them feel better about themselves, healthier or more  
26 attractive to others. Tanning attitudes mediate the association between skin cancer knowledge and  
27 sun-related behaviour,[19,31] and more positive attitudes towards tanning among females are  
28 cosmetically and socially motivated.[20] Moreover, the influence of peers on tanning attitudes is  
29 known to increase as adolescents age.[19] In order to design age-appropriate sun safety  
30 interventions, further research is therefore required to better understand how the balance between  
31 social, cosmetic and health motivations changes over time, especially among young females.  
32  
33  
34  
35  
36  
37  
38  
39  
40  
41  
42  
43

#### 44 **Implications for future policy and research**

45  
46 Our research identifies an urgent need to develop sun safety interventions specifically for Scottish  
47 adolescents. However, our study also suggests that further research is required to ensure  
48 interventions overcome a number of challenges previously highlighted in the literature and  
49 confirmed by our own research. Research is required to assess how skin cancer knowledge, sun-  
50 related behaviour, and tanning attitudes – and the influence of peers and family on knowledge,  
51 behaviour and attitudes – changes as adolescents' age. Testing behaviour change techniques [32]  
52  
53  
54  
55  
56  
57  
58  
59  
60

1  
2  
3 which show promise such as those based on dissonance [33,34] to address the known discordance  
4 between sun protection intention and practice,[30,35] would also be useful. This research is vital  
5 because previous interventions to change sun-safe knowledge and practice have been disappointing  
6 [36] and it is not known which educational techniques are most effective.[37] Despite considerable  
7 challenges of effective intervention development for this age group, previous research has found  
8 that school-based educational interventions to raise adolescents' cancer awareness are  
9 effective,[38] especially among females.[21,39] Hence, multi-component interventions that  
10 incorporate education alongside challenges to societal beliefs around tanning (e.g., the association  
11 between tanned skin, beauty and health) and environmental changes (e.g., provision of sunscreen,  
12 hats and shade in secondary schools) may encourage protective sun-related behaviours. Future  
13 research identified in support of intervention development has potential to have international  
14 impact on reducing the burden on skin cancer.  
15  
16  
17  
18  
19  
20  
21  
22  
23  
24  
25  
26  
27  
28  
29  
30

### 31 **Strengths and limitations**

32 This is the first study to describe Scottish adolescents' sun-related behaviours and tanning attitudes  
33 and assess associations with cancer awareness. It establishes an evidence-base to set the direction  
34 of future research and policy interventions through on-going initiatives such as Detect Cancer Early  
35 in Scotland and the National Awareness and Early Diagnosis Initiative (NAEDI) in England. However,  
36 our study has a number of limitations. First, our sample is drawn from only one Scottish local  
37 authority area (Glasgow City Council) and used purposive rather than probabilistic sampling. Thus,  
38 although 2,173 adolescents from 20 (out of a possible 29) secondary schools in Glasgow were  
39 surveyed, these findings may not be representative of the Scottish adolescent population. However,  
40 Glasgow was purposefully selected as a research site due to known high incidence of malignant  
41 melanoma in the Central Belt of Scotland, a densely populated urban region extending from Glasgow  
42 in the West to Edinburgh in the East.[2] Second, although validated instruments were used for data  
43 collection, results are contingent on adolescents' accurate recall of sun-related behaviour during  
44  
45  
46  
47  
48  
49  
50  
51  
52  
53  
54  
55  
56  
57  
58  
59  
60

1  
2  
3 summer 2012, around 9 to 12 months previously. Previous studies among adolescents have found  
4 recall of sun-related behaviours to be reliable and valid[31], although the possibility that recall bias  
5 influences our findings cannot be discounted due to the length of time since the previous summer  
6 (e.g., reporting of less severe sunburn, frequency of sunburn, or SPF of sunscreen used may be  
7 particularly prone to bias). Finally, because data were gathered as part of a cluster RCT,[22] in order  
8 to enable completion of all instruments during a 55-minute class, a shortened version of an  
9 instrument to assess sun-related knowledge, behaviour and tanning attitudes[19] was used which  
10 meant that replication of analysis conducted elsewhere using the full instrument could not be  
11 conducted.[19] Future research is therefore required using a representative sample of Scottish  
12 adolescents using the full version of the sun instrument with additional items to gather data on  
13 known skin cancer risk factors to enable such analyses and more comprehensive comparison with  
14 studies of similarly aged secondary school students in New Zealand [19] and Australia [28] where  
15 this instrument has been used.  
16  
17  
18  
19  
20  
21  
22  
23  
24  
25  
26  
27  
28  
29  
30  
31  
32

### 33 CONCLUSION

34  
35 Scottish adolescents' awareness of skin cancer symptoms and risk factors was low and matched by  
36 poor sun protection behaviours, most apparent in the high prevalence of (often severe) sunburn  
37 during the previous summer. These findings suggest that if the continuing rise in incidence of  
38 malignant melanoma in Scotland is to be halted, urgent action is required to increase skin cancer  
39 awareness and promote positive sun-related behaviour among Scottish adolescents. Our study  
40 highlights that the relationship between risk knowledge and risk behaviour are complex and  
41 different for adolescent males and females. Thus, further research is needed to inform the  
42 development of effective sun-safe interventions.  
43  
44  
45  
46  
47  
48  
49  
50  
51  
52  
53  
54  
55  
56  
57  
58  
59  
60

**ACKNOWLEDGEMENTS**

We are grateful to the adolescents who completed questionnaires, and the parents, schools, and teachers who supported this work. This independent study was funded by Teenage Cancer Trust and the Scottish Government Detect Cancer Early Programme. The views expressed are not necessarily those of Teenage Cancer Trust or the Scottish Government.

**CONTRIBUTION STATEMENT**

RGK designed and conducted data analysis. GH secured funding and ethical approval. IM and GH managed school and participant recruitment, and data collection. RGK and GH wrote the first draft of the paper, and LF, RDN, REO, and SH provided critical revision for important intellectual content. All authors read and approved the final manuscript.

**FUNDING STATEMENT**

This work was supported by Teenage Cancer Trust and the Scottish Government Detect Cancer Early programme.

**COMPETING INTERESTS STATEMENT**

IM is employed by Teenage Cancer Trust. RGK, LF, RDN, REO, SH and GH declare that they have no conflicts of interest.

**DATA SHARING STATEMENT**

Data collected using the Cancer Awareness Measure (CAM) for the purposes of this study will be available through the UK Data Archive in accordance with the conditions of use of the CAM.

## REFERENCES

1. Thomson CS, Woolnough S, Wickenden M et al. Sunbed use in children aged 11-17 in England: face to face quota sampling surveys in the National prevalence Study and Six Cities study. *BMJ* 2010;**340**:c877.
2. Quinn M, Wood H, Cooper N, et al. Cancer Atlas of the United Kingdom and Ireland 1991–2000 Studies on Medical and Population Subjects No. 68. London: Office for National Statistics: 2005.
3. Information Services Division (iSD). 2013 Cancer Incidence in Scotland. Edinburgh: iSD: 2011.
4. Gandinia S, Serab F, Cattaruzzac MS et al. Meta-analysis of risk factors for cutaneous melanoma: I. Common and atypical naevi. *Eur J Cancer* 2005;**41**:28–44
5. Gandinia S, Serab F, Cattaruzzac MS et al. Meta-analysis of risk factors for cutaneous melanoma: III. Family history, actinic damage and phenotypic factors. *Eur J Cancer* 2005;**41**:2040-2059.
6. Gandinia S, Serab F, Cattaruzzac MS et al. Meta-analysis of risk factors for cutaneous melanoma: II sun exposure. *Eur. J. Cancer* 2005;**41**:45-60.
7. Parkin DM, Mesher D, Sasieni P. Cancer attributable to solar (ultraviolet) radiation exposure in the UK in 2010. *Br J Cancer* 2011;**105**:S66-S69.
8. Cancer Research UK (CRUK). Teenage and young adult cancer incidence statistics. 2013. Available online: <http://www.cancerresearchuk.org/cancer-info/cancerstats/teenage-and-young-adult-cancer/>
9. Cancer Research UK (CRUK). Skin cancer survival statistics. 2013. Available online: <http://www.cancerresearchuk.org/cancer-info/cancerstats/types/skin/survival/#source6>
10. Information Services Division (iSD). Trends in Cancer Survival in Scotland, 1983-2007. Edinburgh: iSD: 2010.
11. Betti RR, Vergani R, Tolomio E et al. Factors of delay in the diagnosis of melanoma. *Eur J Dermatol* 2003;**13**:183-188.
12. Krige JE, Isaacs S, Hudson DA et al. Delay in the diagnosis of cutaneous malignant melanoma. A prospective study in 250 patients. *Cancer* 1991;**68**:2064-2068.

- 1
- 2
- 3 13. Richard MA, Grob JJ, Avril MF et al. Melanoma and tumor thickness: Challenges of early
- 4 diagnosis. Arch Dermatol 1999;**135**:269-274.
- 5
- 6
- 7 14. Department of Health (DH) Cancer Reform Strategy. London: DH: 2007.
- 8
- 9 15. Scottish Government. Detect Cancer Early Initiative: Draft Plan. Edinburgh: Scottish
- 10 Government: 2011.
- 11
- 12
- 13 16. Suppa M, Cazzaniga S, Fagnoli MC, et al. Knowledge, perceptions and behaviours about skin
- 14 cancer and sun protection among secondary school students from Central Italy. J Eur Acad
- 15 Dermatol Verereol, 2013;**27**:571-579.
- 16
- 17
- 18 17. Saridi M, Toska A, Pappa V et al Knowledge, attitudes and self care practices related to sun
- 19 protection among teenagers in Greece. Arch Hellenic Med 2009;**26**:355-65.
- 20
- 21
- 22 18. Knight JM, Kirincich AN, Farmer ER, et al. Awareness of the risks of tanning lamps does not
- 23 influence behaviour among college students. Arch Dermatol 2002;**138**:1311-1315.
- 24
- 25
- 26 19. Wright C, Reeder AI, Gray A et al. Child sun protection: sun-related attitudes mediate the
- 27 association between children's knowledge and behaviours. J Pediatr Child Health 2008;**44**:692-
- 28 698.
- 29
- 30
- 31 20. Sjoberg, Holm L-E, Ullen H, et al. Tanning and risk perception in adolescents. Health, Risk and
- 32 Society 2004;**6**:81-94.
- 33
- 34
- 35 21. Kyle RG, Nicoll A, Forbat L, et al. Adolescents' awareness of cancer risk factors and associations
- 36 with health-related behaviours. Health Educ Res 2013;**28**:816-827.
- 37
- 38
- 39 22. Kyle RG, Macmillan I, Rauchhaus P, et al. Adolescent Cancer Education (ACE) to increase
- 40 adolescent and parent cancer awareness and communication: Study protocol for a cluster
- 41 randomised controlled trial. Trials 2013;**14**:286.
- 42
- 43
- 44 23. Economic and Social Research Council (ESRC): ESRC Framework for Research Ethics. Swindon:
- 45 ESRC: 2010.
- 46
- 47
- 48 24. Cancer Research UK. Cancer Awareness Measure Toolkit V2.1. London: Cancer Research UK:
- 49 2011.
- 50
- 51
- 52
- 53
- 54
- 55
- 56
- 57
- 58
- 59
- 60

- 1  
2  
3 25. Kyle RG, Forbat L, Hubbard G. Cancer awareness among adolescents in Britain: a cross-sectional  
4 study. *BMC Public Health* 2012;**12**:580.  
5  
6
- 7 26. Kasparian NA, McLoone JK, Meiser B. Skin-cancer related prevention and screening behaviours:  
8 a review of the literature. *J Behav Med* 2009;**32**:406-428.  
9  
10
- 11 27. Larsman P, Eklof M, Torner M. Adolescents' risk perceptions in relation to risk behaviour with  
12 long-term health consequences; antecedents and outcomes: a literature review. *Safety Science*  
13 2012;**50**:1740-1748.  
14  
15
- 16 28. Volkov A, Dobbinson S, Wakefield M, et al. Seven-year trends in sun protection and sunburn  
17 among Australian adolescents and adults. *Aust N Z J Public Health* 2013;**37**: 63-69.  
18  
19
- 20 29. Behrens CL, Thorgaard C, Philip A, et al. Sunburn in children and adolescents: associations with  
21 parents' behaviour and attitudes. *Scand J Public Health* 2013;**41**:302-310.  
22  
23
- 24 30. Hedges T, Scriven A. Young park users' attitudes and behaviour to sun protection. *Glob Health*  
25 *Promot* 2010;**17**:24-31.  
26  
27
- 28 31. Andreeva VA, Reynolds KD, Buller DB, et al. Concurrent psychosocial predictors of sun safety  
29 among middle school youth. *J Sch Health* 2008;**78**:374-381.  
30  
31
- 32 32. Michie S, Richardson M, Johnston M, et al. The behaviour change taxonomy (v1) of 93  
33 hierarchically clustered techniques: building an international consensus for the reporting of  
34 behaviour change interventions. *Ann Behav Med* 2013;**46**:81-95.  
35  
36
- 37 33. Freijy T, Kothe EJ. Dissonance-based interventions for health behaviour change: a systematic  
38 review. *Br J Health Psychol* 2013;**18**:310-337.  
39  
40
- 41 34. Stone J, Fernandez NC. When thinking about less failure causes more dissonance: the effect of  
42 elaboration and recall on behaviour change following hypocrisy. *Social Influence* 2011;**6**:199-  
43 211.  
44  
45
- 46 35. Dobbinson SJ, Jansen K, Dixon HG, et al. Assessing population-wide behaviour change:  
47 concordance of 10-year trends in self-reported and observed sun protection. *Int J Public Health*  
48 2013 (Online Early) doi: 10.1007/s00038-013-0454-5  
49  
50  
51  
52  
53  
54  
55  
56  
57  
58  
59  
60



- 1  
2  
3 36. Craciun C, Schuz N, Lippke S, et al. Enhancing planning stages for sunscreen use at different  
4 stages of change. Health Educ Res 2012;**27**:857-867.  
5  
6  
7 37. Bellamy R A. Systematic review of educational interventions for promoting sun protection  
8 knowledge, attitudes and behaviour following the QUESTS approach. Med Teach 2005;**27**:269-  
9 275.  
10  
11  
12  
13 38. Saraiya M, Glanz K, Briss PA, et al. Interventions to prevent skin cancer by reducing exposure to  
14 ultraviolet radiation: a systematic review. Am J Prev Med 2004;**27**:422-426.  
15  
16  
17  
18 39. Kyle RG, Forbat L, Rauchhaus P et al. Increased cancer awareness among British adolescents  
19 after a school-based educational intervention: a controlled before-and-after study with 6-  
20 month follow-up. BMC Public Health 2013;**13**:190.  
21  
22  
23  
24  
25  
26  
27  
28  
29  
30  
31  
32  
33  
34  
35  
36  
37  
38  
39  
40  
41  
42  
43  
44  
45  
46  
47  
48  
49  
50  
51  
52  
53  
54  
55  
56  
57  
58  
59  
60

## TABLES

**Table 1:** Sample socio-demographic characteristics

|                                 | n     | %      |
|---------------------------------|-------|--------|
| <i>Gender</i>                   |       |        |
| Male                            | 1,032 | 47.5   |
| Female                          | 1,102 | 50.7   |
| Missing                         | 39    | 1.8    |
| <i>Age</i>                      |       |        |
| Mean (SD)                       | 12.4  | (0.55) |
| <i>Ethnicity</i>                |       |        |
| White                           | 1,826 | 84.0   |
| Mixed                           | 75    | 3.5    |
| Asian                           | 131   | 6.0    |
| Black                           | 57    | 2.6    |
| Chinese                         | 15    | 0.7    |
| Other                           | 28    | 1.3    |
| Missing                         | 41    | 1.9    |
| <i>Knew someone with cancer</i> |       |        |
| Yes                             | 1,266 | 58.3   |
| No                              | 783   | 36.0   |
| Missing                         | 124   | 5.7    |

**Table 2:** Tanning attitudes and gender

| Statement                                                             | Female            | Male              | Significance*                                |
|-----------------------------------------------------------------------|-------------------|-------------------|----------------------------------------------|
| % Strongly agree/agree (n)                                            |                   |                   |                                              |
| Most of my friends think a suntan is a good thing.                    | <b>53.1 (554)</b> | <b>37.7 (355)</b> | $\chi^2(1, 1985)=47.48$<br><b>p&lt;0.001</b> |
| Most of my family think a suntan is a good thing.                     | 29.0 (301)        | 27.8 (260)        | $\chi^2(1, 1974)=0.36$<br>p=0.548            |
| I like to have a suntan because it makes me feel better about myself. | <b>30.8 (320)</b> | <b>18.0 (169)</b> | $\chi^2(1, 1978)=43.10$<br><b>p&lt;0.001</b> |
| A suntan makes me feel more attractive to others.                     | <b>22.7 (235)</b> | <b>18.1 (169)</b> | $\chi^2(1, 1969)=6.40$<br><b>p=0.011</b>     |
| I like to have a suntan because I feel healthier.                     | <b>16.2 (169)</b> | <b>10.1 (95)</b>  | $\chi^2(1, 1980)=15.99$<br><b>p&lt;0.001</b> |

**Notes:**

\* Pearson's  $\chi^2$  test for 2x2 tables (i.e., strongly agree/agree vs. disagree/strongly disagree/don't know). Statistically significant associations at the p<0.05 level are emboldened.

**Table 3:** Tanning attitudes and sun-related behaviour

| Statement<br>% Strongly agree/agree (n)                               | Female            |                   |                                              | Sunburnt          |                   |                                             | Sunbed use       |                   |                                             |
|-----------------------------------------------------------------------|-------------------|-------------------|----------------------------------------------|-------------------|-------------------|---------------------------------------------|------------------|-------------------|---------------------------------------------|
|                                                                       | Sunbathed         |                   | Significance*                                | Sunburnt          |                   | Significance*                               | Sunbed use       |                   | Significance*                               |
|                                                                       | Yes               | No                |                                              | Yes               | No                |                                             | Yes              | No                |                                             |
| Most of my friends think a suntan is a good thing.                    | <b>61.8 (371)</b> | <b>40.6 (177)</b> | $\chi^2(1, 1036)=45.71$<br><b>p&lt;0.001</b> | <b>60.1 (370)</b> | <b>42.7 (157)</b> | $\chi^2(1, 984)=28.05$<br><b>p&lt;0.001</b> | 62.1 (41)        | 52.1 (500)        | $\chi^2(1, 1026)=2.50$<br>p=0.114           |
| Most of my family think a suntan is a good thing.                     | <b>35.7 (214)</b> | <b>19.9 (86)</b>  | $\chi^2(1, 1031)=30.44$<br><b>p&lt;0.001</b> | 31.1 (191)        | 25.6 (94)         | $\chi^2(1, 982)=3.31$<br>p=0.069            | 39.1 (25)        | 28.1 (269)        | $\chi^2(1, 1021)=3.51$<br>p=0.061           |
| I like to have a suntan because it makes me feel better about myself. | <b>42.6 (255)</b> | <b>14.5 (63)</b>  | $\chi^2(1, 1032)=93.32$<br><b>p&lt;0.001</b> | <b>38.0 (234)</b> | <b>20.6 (75)</b>  | $\chi^2(1, 980)=32.02$<br><b>p&lt;0.001</b> | 33.3 (22)        | 30.4 (291)        | $\chi^2(1, 1022)=0.24$<br>p=0.622           |
| A suntan makes me feel more attractive to others.                     | <b>31.3 (187)</b> | <b>10.9 (47)</b>  | $\chi^2(1, 1029)=59.62$<br><b>p&lt;0.001</b> | <b>26.6 (163)</b> | <b>16.4 (60)</b>  | $\chi^2(1, 979)=13.55$<br><b>p&lt;0.001</b> | 26.2 (17)        | 22.4 (213)        | $\chi^2(1, 1018)=0.50$<br>p=0.478           |
| I like to have a suntan because I feel healthier.                     | <b>23.2 (139)</b> | <b>6.9 (30)</b>   | $\chi^2(1, 1035)=48.86$<br><b>p&lt;0.001</b> | <b>18.0 (111)</b> | <b>12.4 (46)</b>  | $\chi^2(1, 986)=5.40$<br><b>p=0.020</b>     | 19.7 (13)        | 15.6 (150)        | $\chi^2(1, 1025)=0.76$<br>p=0.383           |
|                                                                       | Male              |                   |                                              |                   |                   |                                             |                  |                   |                                             |
|                                                                       | Sunbathed         |                   |                                              | Sunburnt          |                   |                                             | Sunbed use       |                   |                                             |
|                                                                       | Yes               | No                | Significance*                                | Yes               | No                | Significance*                               | Yes              | No                | Significance*                               |
| Most of my friends think a suntan is a good thing.                    | <b>54.8 (154)</b> | <b>30.3 (197)</b> | $\chi^2(1, 932)=50.36$<br><b>p&lt;0.001</b>  | <b>41.9 (195)</b> | <b>34.5 (143)</b> | $\chi^2(1, 880)=5.18$<br><b>p=0.023</b>     | 37.9 (22)        | 38.0 (325)        | $\chi^2(1, 914)=0.00$<br>p=0.996            |
| Most of my family think a suntan is a good thing.                     | <b>43.5 (121)</b> | <b>21.1 (137)</b> | $\chi^2(1, 926)=48.49$<br><b>p&lt;0.001</b>  | 30.3 (139)        | 25.2 (104)        | $\chi^2(1, 876)=2.55$<br>p=0.110            | <b>39.7 (23)</b> | <b>26.4 (225)</b> | $\chi^2(1, 909)=4.78$<br><b>p=0.029</b>     |
| I like to have a suntan because it makes me feel better about myself. | <b>32.9 (91)</b>  | <b>11.7 (76)</b>  | $\chi^2(1, 928)=59.06$<br><b>p&lt;0.001</b>  | <b>21.6 (100)</b> | <b>13.8 (57)</b>  | $\chi^2(1, 876)=9.02$<br><b>p=0.003</b>     | <b>29.3 (17)</b> | <b>17.0 (145)</b> | $\chi^2(1, 911)=5.63$<br><b>p=0.018</b>     |
| A suntan makes me feel more attractive to others.                     | <b>32.1 (88)</b>  | <b>12.2 (79)</b>  | $\chi^2(1, 924)=51.88$<br><b>p&lt;0.001</b>  | 20.0 (93)         | 15.9 (66)         | $\chi^2(1, 880)=2.59$<br>p=0.108            | <b>30.9 (17)</b> | <b>17.1 (145)</b> | $\chi^2(1, 905)=6.74$<br><b>p=0.009</b>     |
| I like to have a suntan because I feel healthier.                     | <b>19.8 (54)</b>  | <b>5.8 (38)</b>   | $\chi^2(1, 928)=42.16$<br><b>p&lt;0.001</b>  | <b>12.0 (56)</b>  | <b>7.2 (30)</b>   | $\chi^2(1, 884)=5.88$<br><b>p=0.015</b>     | <b>25.0 (14)</b> | <b>9.0 (77)</b>   | $\chi^2(1, 926)=14.88$<br><b>p&lt;0.001</b> |

Notes:

\* Pearson's  $\chi^2$  test for 2x2 tables (i.e., Strongly agree/agree vs. Strongly disagree/disagree/neither agree or disagree/don't know). Statistically significant associations at the p<0.05 level are emboldened.

**Table 4:** Associations between sun-related behaviour and cancer awareness

| Symptom:<br>'change in the appearance of a mole'<br>% Yes (n)                              | Sunbathed  |            |                                   | Sunburnt          |                   |                                                           | Sunbed use |            |                                   |
|--------------------------------------------------------------------------------------------|------------|------------|-----------------------------------|-------------------|-------------------|-----------------------------------------------------------|------------|------------|-----------------------------------|
|                                                                                            | Yes        | No         | Significance*                     | Yes               | No                | Significance*                                             | Yes        | No         | Significance*                     |
| Female                                                                                     | 50.1 (304) | 46.0 (204) | $\chi^2(1, 1050)=1.67$<br>p=0.197 | <b>51.0 (317)</b> | <b>44.1 (163)</b> | <b><math>\chi^2(1, 991)=4.54</math></b><br><b>p=0.033</b> | 55.4 (36)  | 47.6 (461) | $\chi^2(1, 1033)=1.47$<br>p=0.225 |
| Male                                                                                       | 43.8 (127) | 43.1 (289) | $\chi^2(1, 960)=0.036$<br>p=0.850 | 44.6 (210)        | 41.9 (178)        | $\chi^2(1, 896)=0.67$<br>p=0.415                          | 36.2 (21)  | 44.1 (386) | $\chi^2(1, 934)=1.37$<br>p=0.243  |
| Risk factor: 'getting sunburnt more<br>than once as a child'<br>% Strongly agree/agree (n) | Sunbathed  |            |                                   | Sunburnt          |                   |                                                           | Sunbed use |            |                                   |
|                                                                                            | Yes        | No         | Significance*                     | Yes               | No                | Significance*                                             | Yes        | No         | Significance*                     |
| Female                                                                                     | 43.9 (265) | 42.4 (186) | $\chi^2(1, 1043)=0.24$<br>p=0.628 | 44.5 (276)        | 41.3 (151)        | $\chi^2(1, 986)=1.00$<br>p=0.318                          | 36.4 (24)  | 43.9 (422) | $\chi^2(1, 1027)=1.43$<br>p=0.231 |
| Male                                                                                       | 38.9 (112) | 37.4 (244) | $\chi^2(1, 941)=0.20$<br>p=0.657  | 40.8 (189)        | 34.6 (144)        | $\chi^2(1, 879)=3.59$<br>p=0.058                          | 41.1 (23)  | 37.5 (321) | $\chi^2(1, 913)=0.29$<br>p=0.589  |

Notes:

\* Pearson's  $\chi^2$  test for 2x2 tables (i.e., Symptom: Yes vs. No/Don't know; Risk factor: Strongly agree/agree vs. Strongly disagree/disagree/neither agree or disagree/don't know). Statistically significant associations at the p<0.05 level are emboldened.

1  
2  
3  
4  
5  
6  
7 **SCOTTISH ADOLESCENTS' SUN-RELATED BEHAVIOURS, TANNING ATTITUDES AND**  
8  
9 **ASSOCIATIONS WITH SKIN CANCER AWARENESS: A CROSS-SECTIONAL STUDY**  
10

11  
12 Richard G Kyle\*<sup>1</sup>

13  
14 Iona Macmillan<sup>2</sup>

15  
16 Liz Forbat<sup>1</sup>

17  
18 Richard D Neal<sup>3</sup>

19  
20 Ronan E O'Carroll<sup>4</sup>

21  
22 Sally Haw<sup>5</sup>

23  
24 Gill Hubbard<sup>1</sup>

25  
26  
27 <sup>1</sup> Cancer Care Research Centre, School of Nursing, Midwifery and Health, University of Stirling,

28  
29 Stirling, UK, FK9 4LA

30  
31 <sup>2</sup> Teenage Cancer Trust, 93 Newman Street, London, UK, W1T 3EZ

32  
33 <sup>3</sup> North Wales Centre for Primary Care Research, Bangor University, Bangor, UK, LL13 7YP

34  
35 <sup>4</sup> Division of Psychology, School of Natural Sciences, University of Stirling, Stirling, UK, FK9 4LA

36  
37 <sup>5</sup> School of Nursing, Midwifery and Health, University of Stirling, Stirling, UK, FK9 4LA

38  
39  
40 \* Corresponding author

41  
42 Email: richard.kyle@stir.ac.uk

43  
44 Telephone: +44(0)1463 255623  
45  
46  
47  
48  
49  
50  
51  
52  
53  
54  
55  
56  
57  
58  
59  
60

**ABSTRACT**

**Objectives:** To describe Scottish adolescents' sun-related behaviours and tanning attitudes and assess associations with skin cancer awareness.

**Design:** Cross-sectional study.

**Setting:** 20 state secondary schools in one Scottish local authority (Glasgow City).

**Participants:** 2,173 adolescents (female: 50.7%, n=1,102) with a mean age of 12.4 (Standard Deviation = 0.55).

**Outcome measures:** Sun-related behaviour (suntan, sunbathing, sunburn, sunscreen use, sunbed use), tanning attitudes, skin cancer-related symptom and risk factor awareness.

**Results:** Adolescents reported poor sun-related practice: 51% of adolescents reported sunburn the previous summer and 38% indicated sunburn on more than one occasion. Skin cancer awareness was low: 45% recognised 'change in the appearance of a mole' as a cancer symptom, and 39% agreed that 'getting sunburnt more than once as a child' increased cancer risk. 42% and 26% of adolescents, respectively, reported that friends and family held pro-tanning attitudes. Compared to males, females were statistically significantly more likely to: report sunbathing ( $p<0.001$ ), use of lotions or oil to aid tanning ( $p<0.001$ ), and sunburn ( $p<0.001$ ); know that changes in the appearance of a mole was a skin cancer symptom ( $p=0.036$ ) and sunburn more than once as a child was a skin cancer risk factor ( $p=0.005$ ); perceive their friends to hold pro-tanning attitudes ( $p<0.001$ ) and indicate that a tan made them feel better about themselves ( $p<0.001$ ), more attractive to others ( $p=0.011$ ) and healthier ( $p<0.001$ ).

**Conclusions:** Scottish adolescents had poor sun protection practice and low skin cancer awareness. Girls adopted riskier sun-related behaviour despite greater awareness of skin cancer-related risk. Urgent action is required to promote positive sun-related behaviour and increase skin cancer awareness among Scottish adolescents. However, further research is needed to inform the development of effective sun-safe interventions.

### STRENGTHS AND LIMITATIONS OF THIS STUDY

- This is the first study to describe Scottish adolescents' sun-related behaviours and tanning attitudes and assess associations with [cancer-malignant melanoma](#) symptom and risk factor awareness.
- Findings establish evidence to support on-going government initiatives to increase the proportion of people with early diagnosis, including [Detect Cancer Early \(DCE\) in Scotland and the National Awareness and Early Diagnosis Initiative \(NAEDI\) in England](#) and [Detect Cancer Early \(DCE\) in Scotland](#).
- Adolescents in only one Scottish local authority area were surveyed and non-probabilistic sampling was used, although Glasgow was purposefully selected due to known high incidence of malignant melanoma in the Central Belt of Scotland, a densely populated urban region extending from Glasgow in the West to Edinburgh in the East.

### KEYWORDS

Malignant melanoma, skin cancer, tanning attitudes, sunburn, sunbeds, sun protection, health-related behaviour, health promotion

### WORD COUNT

[3,5123,586](#)

## INTRODUCTION

Rates of malignant melanoma are rising more rapidly than for any other cancer in the United Kingdom (UK) [1] and Scotland has above average incidence when compared to the rest of the UK.[2] Incidence of malignant melanoma in Scotland significantly increased by 51.4% ( $p < 0.0001$ ) over the past decade.[3] Light skin colour, blonde or red hair, number of moles,[4] family history,[5] and excess exposure to ultraviolet radiation, particularly in childhood, are the main risk factors for malignant melanoma.[6] It is estimated that 86% of malignant melanoma cases in the UK can be attributable to excess exposure to UV radiation (Male = 90%, Female = 82%), and that these proportions are “very much greater at younger ages”.[7]

Malignant melanoma is the fifth most common teenage and young adult (TYA) cancer in the UK, accounting for 11% of the 2,200 average annual cases among those aged 15-24.[8] Almost twice as many females ( $n=153$ ) than males ( $n=73$ ) are diagnosed with malignant melanoma annually, making it the third and sixth most common cancer in young women and men, respectively.[8] Incidence of malignant melanoma significantly increased by 32% among young females between 1995 and 2009.[8]

Across the UK survival rates for malignant melanoma are high and increasing over time,[9] and in Scotland five-year survival rates rose by 21% over the past 20 years, from 64% in the period 1983-97 to 85% in 2003-07.[10] Survival is higher in younger people[10] and there is some evidence that longer time durations prior to diagnosis may be associated with poorer outcomes.[11-13] UK government health departments are therefore committed to improving awareness as part of a strategy to increase the proportion of people with early diagnosis.[14,15] Increasing adolescents' awareness of skin cancer risk associated with UV exposure and encouraging sun protective practices may therefore have potential to reduce the burden of malignant melanoma both in adolescence and early adulthood, as well as later life through the establishment of protective health-related



1  
2  
3  
4  
5  
6  
7 behaviours. However, previous research has found that although adolescents' awareness of skin  
8 cancer and its association with UV exposure is generally good [16,17] this knowledge does not  
9 translate into sun-safe behaviour,[18,19] especially among young females.[19-21]  
10  
11

12  
13  
14 Little evidence exists around the association between sun-related behaviours and cancer awareness  
15 among adolescents in the UK. Only one UK study to date has examined the association between  
16 sunscreen and sunbed use and cancer awareness, which found that female adolescents who used  
17 sunbeds were statistically significantly more likely to agree that UV exposure was a cancer risk  
18 factor.[21] Moreover, patterns of sun-related behaviours (i.e., sunbathing, sunburn) and protective  
19 practices (i.e., sunscreen use) and tanning attitudes among Scottish adolescents have not previously  
20 been described. This lack of evidence hampers development of interventions to increase cancer  
21 awareness and change sun-related behaviours in support of government initiatives. Hence, the aims  
22 of this study were to: 1) describe the sun-related behaviours and tanning attitudes among Scottish  
23 adolescents; and 2) assess associations between sun-related behaviour, tanning attitudes and cancer  
24 awareness.  
25  
26  
27  
28  
29  
30  
31  
32  
33  
34  
35

## 36 37 **METHODS**

### 38 39 **Study design**

40 Data are drawn from the Adolescent Cancer Education (ACE) study, the design of which is described  
41 in the published protocol.[22] Briefly, ACE is a cluster randomised controlled trial (RCT) to assess the  
42 effectiveness of a school-based educational intervention on adolescents' and parents' cancer  
43 awareness and communication. Data were collected at three time-points: baseline (prior to  
44 intervention delivery), and at two-weeks, and six-month follow-up. This paper reports cross-  
45 sectional analysis of baseline data.  
46  
47  
48  
49  
50  
51  
52  
53  
54  
55  
56  
57  
58  
59  
60

### Setting and Sample

All 29 state secondary schools (excluding special-schools for adolescents with special educational needs) in the Glasgow City Council area were invited to participate. Recruitment ended when, and the (pragmatic) target of 20 schools (69.0%) were agreed to participate recruited. All 3,223 adolescents on the school register at the end of their first year (S1) of secondary education (age 12/13 years) in study schools were invited to participate in the study, of which 2,173 (67.4%) consented to data collection.

### Recruitment and consent

Schools were recruited in May 2013 and adolescents in June 2013. School head teachers were contacted by letter, which was followed up with a telephone call and face-to-face meeting to invite participation in the study. Parents/carers were sent a letter and information sheet about the study, which included a form to be returned to school if they wished to opt their child out of the study. The opt-out method of parental consent has been found to be ethically acceptable.[23] Adolescents were provided with an information sheet at the time measurements were undertaken and also asked to give written consent to their participation in the study.

### Survey instrument

Data were collected in June 2013 (i.e., northern hemisphere summer) using a self-complete paper questionnaire administered by teachers to a whole class under exam conditions but students were informed that it was not a test. Teachers encouraged students to complete as much of the questionnaire as they could within the 50 or 55 minute lesson period.

The instrument incorporated validated questions on adolescents' sun-related behaviours and tanning attitudes,[19] the Cancer Awareness Measure (CAM),[24,25] and socio-demographic questions.

1  
2  
3  
4  
5  
6  
7  
8  
9 *Sun-related behaviours and tanning attitudes*

10 Adolescents' tanning attitudes and sun-related behaviours were assessed using items from an  
11 instrument developed in New Zealand.[19] Sun-related behaviours, including sunbathing, getting a  
12 suntan, use of sun beds and sun-protection practices [during the previous summer \(i.e., 2012\) or past](#)  
13 [12 months](#) were assessed through ten questions. Attitudes towards tanning were assessed through  
14 five statements which used a five-point Likert scale to ask adolescents if a suntan made them 'feel  
15 healthier', 'more attractive to others' or 'better about themselves', and if friends and family thought  
16 that a suntan was a 'good thing'. For analysis, responses were dichotomised (i.e., 'yes' versus 'no';  
17 'strongly agree'/'agree' versus 'neither agree nor disagree'/'disagree'/'strongly disagree').  
18  
19  
20  
21  
22  
23  
24  
25  
26

27 *Skin cancer symptom and risk factor awareness*

28 Adolescents' awareness of skin cancer related symptoms and risk factors were assessed through two  
29 questions in the CAM. Awareness of the cancer sign 'change in the appearance in a mole' was  
30 assessed alongside eight other cancer signs and symptoms through a recognition question.  
31 Awareness of the skin cancer-related risk factor 'getting sunburnt more than once as a child' was  
32 assessed alongside ten other cancer risk factors on a five-point Likert scale. In accordance with  
33 previous practice,[21,25] responses were dichotomised for analysis (i.e., mole: 'Yes' versus  
34 'No'/'Don't know'; sunburn: 'strongly agree'/'agree' versus 'not sure'/'disagree'/'strongly disagree').  
35  
36  
37  
38  
39  
40  
41  
42  
43

44 *Socio-demographic characteristics*

45 Socio-demographic questions were included to gather data on: age, gender, ethnicity, and whether  
46 the student had been diagnosed ~~with cancer~~ or knew a relative or friend who had been diagnosed  
47 with [any](#) cancer.  
48  
49  
50  
51  
52  
53  
54  
55  
56  
57  
58  
59  
60

### Data analysis

Descriptive statistics were calculated for demographic variables (i.e., age, gender, ethnicity, knowing someone with cancer), sun-related behaviours and tanning attitudes, and skin cancer related symptom and risk factor awareness. Pearson's chi-square ( $\chi^2$ ) tests were used to assess associations between: (1) sun-related behaviours and gender; (2) tanning attitudes and gender and sun-related behaviour; (3) skin cancer-related symptom and risk factor awareness and gender, sun-related behaviours, and tanning attitudes. Data were analysed using SPSS 19.0. Significance tests were two-sided;  $p < 0.05$  was considered statistically significant.

### Ethical considerations

Approval for the study was obtained from the Research Ethics Committee in the School of Nursing, Midwifery and Health, University of Stirling ([reference: 13/14\(83\)](#)). Glasgow City Council, Planning, Performance and Research Unit approved the involvement of secondary schools. All General Practitioner (GP) practices in the research site were informed about the study.

## RESULTS

### Sample

The sample included 2,173 (female:  $n=1,102$ , 50.7%) adolescents with a mean age of 12.4 (Standard Deviation [SD] = 0.55) at the time of the survey. Socio-demographic characteristics of respondents are shown in Table 1.

*[Insert Table 1 here]*

## Sun-related behaviours

### *Suntan*

Around two-thirds (61.3%, n=1,333) of adolescents reported getting a suntan last summer. Slightly more girls than boys reported a suntan, although this difference was not statistically significant (Girls: 66.2% [n=700], Boys: 63.4% [n=616];  $\chi^2(1, 2030)=1.73, p=0.189$ ).

### *Sunbathing*

Four in ten (42.2%, n=916) adolescents reported sunbathing regularly last summer to try to get a tan. Girls were statistically significantly more likely to report sunbathing (Girls: 57.8% [n=611], Boys: 30.4% [n=294];  $\chi^2(1, 2025)=152.86, p<0.001$ ). Of those who sunbathed, 44.2% (n=405) reported using oils or lotions to aid tanning. Girls who sunbathed were statistically significantly more likely than boys to report using oils or lotions to help get a tan (Girls: 47.4% [n=289], Boys: 38.1% [n=111];  $\chi^2(1, 901)=6.80, p=0.009$ ).

### *Sunburn*

Half of adolescents (51.2%, n=1,112) reported getting sunburnt last summer, of whom around two-thirds (61.7%, n=686) reported getting sunburnt on one occasion, and over a third (38.3%, n=426) reported getting sunburnt on more than one occasion. Girls were statistically significantly more likely to report getting sunburnt last summer (Girls: 62.6% [n=625], Boys: 52.7% [n=476];  $\chi^2(1, 1902)=19.34, p<0.001$ ). Of girls who reported getting sunburnt (n=625), almost 1 in 10 (8.2%, n=51) said that their 'skin went red, sore and blistered', nearly 4 in 10 (39.0%, n=244) said their 'skin went red and sore'; 24.0% (n=150) reported their 'skin went red but not sore' and 27.7% (n=173) said their 'skin went pink or slightly red'. A greater proportion of boys than girls reported 'red, sore and blistered skin' (11.3%, n=54), although fewer reported that their 'skin went red and sore' (34.2%,

1  
2  
3  
4  
5  
6  
7 n=163); 24.4% (n=116) reported their 'skin went red but not sore', and 27.9% (n=133) said their 'skin  
8 went pink or slightly red'.  
9

#### 10 *Sunscreen use*

11  
12 Nearly a fifth of adolescents (16.8%, n=365) reported that they 'didn't usually use sunscreen'. Of  
13 those who reported using sunscreen (74.0%, n=1609), over half (52.6%, n=847) did not know the Sun  
14 Protection Factor (SPF) of the sunscreen they usually used. The greatest proportion of adolescents  
15 who could identify the SPF of the sunscreen used SPF >30 (19.7%, n=317), followed by: SPF30  
16 (15.2%, n=244); SPF15 (8.0%, n=129), and SPF <15 (4.5%, n=72).  
17  
18  
19  
20  
21  
22

23 Of those who reported getting sunburnt (51.2%, n=1,112), 1 in 10 (11.6%, n=129) reported that they  
24 did not use sunscreen. Boys who got sunburnt were statistically significantly more likely to report  
25 not using sunscreen, with over 1 in 4 reporting that they did not use sunscreen (Boys: 27.9% [n=72],  
26 Girls: 15.4% [n=57];  $\chi^2(1, 629)=14.69, p<0.001$ ).  
27  
28  
29  
30  
31

#### 32 *Sunbed use*

33  
34 1 in 20 (5.8%, n=127) adolescents reported using a sunbed in the last 12 months. There was no  
35 statistically significant gender difference in sunbed use (Girls: 6.3% [n=66], Boys: 6.3% [n=59];  $\chi^2(1,$   
36 1980)=0.003, p=0.959).  
37  
38  
39  
40  
41

#### 42 **Tanning attitudes**

43  
44 Peers exerted the greatest influence on adolescents' attitudes towards tanning with two-fifths  
45 (42.3%, n=918) stating that they strongly agreed or agreed with the statement 'most of my friends  
46 think a suntan is a good thing'. A quarter of adolescents (26.1%, n=567) agreed that their family  
47 thought a suntan was a good thing. A fifth of adolescents agreed that a suntan made them feel  
48 better about themselves (22.7%, n=492) and that a suntan made them feel more attractive to others  
49  
50  
51  
52  
53  
54  
55  
56  
57  
58  
59  
60

1  
2  
3  
4  
5  
6  
7 (18.8%, n=409). A tenth (12.3%, n=267) agreed that they liked to have a suntan because it made  
8 them feel healthier. Gender differences were investigated and are summarised in Table 2.  
9

10  
11  
12 *[Insert Table 2 here]*  
13

14  
15  
16 Adolescents of both sexes who reported sunbathing were statistically significantly more likely to  
17 agree with each of the five tanning attitude statements than those who did not report sunbathing  
18 (Table 3). Boys who reported using sunbeds were statistically significantly more likely to agree with  
19 four of the five statements, the exception being the statement 'most of my friends think a suntan is  
20 a good thing' for which there was no difference between boys who did and did not report sunbed  
21 use (Table 3).  
22  
23  
24  
25  
26  
27

28  
29 *[Insert Table 3 here]*  
30  
31

### 32 **Sun-related behaviour and cancer awareness**

#### 33 *Symptom awareness*

34  
35  
36 Less than half (45.2%, n=982) of adolescents thought that change in the appearance of a mole could  
37 be a sign of cancer. Girls were statistically significantly more likely to recognise that a change in the  
38 appearance of a mole was potentially a sign of cancer (Girls: 48.0% [n=524]; Boys: 43.5% [n=444];  
39  
40  
41  
42  $\chi^2(1, 2112)=4.38, p=0.036$ ).  
43  
44  
45

46 The only statistically significant association between symptom awareness and sun-related behaviour  
47 was among females who reported getting sunburnt, who were more likely to agree that a change in  
48 the appearance of a mole was potentially a sign of cancer (Table 4).  
49  
50

#### 51 *Risk factor awareness*

52  
53  
54  
55  
56  
57  
58  
59  
60

1  
2  
3  
4  
5  
6  
7 Four in ten (39.1%, n=849) adolescents thought that getting sunburnt more than once as a child was  
8 a risk factor of cancer. Girls were statistically significantly more likely to agree that getting sunburnt  
9 more than once as a child was a cancer risk factor (Girls: 43.4% [n=469]; Boys: 37.3% [n=370];  $\chi^2(1,$   
10 2071)=7.95, p=0.005).  
11  
12  
13

14  
15  
16 There were no statistically significant associations between awareness of getting sunburnt more  
17 than once as a child and sun-related behaviours, although adolescents of both sexes who reported  
18 getting sunburnt were more likely to agree that sunburn was a cancer risk factor (Table 4).  
19  
20  
21

22  
23 *[Insert Table 4 here]*  
24  
25

## 26 27 **DISCUSSION**

28  
29 Scottish adolescents' awareness of the symptoms and risk factors associated with skin cancer was  
30 low: less than half of adolescents identified 'change in the appearance of a mole' as a sign of cancer  
31 and fewer than 40% agreed that 'getting sunburnt more than once as a child' increased cancer risk.  
32 This confirms findings from an earlier small-scale UK study [21] and suggests that awareness of skin  
33 cancer symptoms and risks among Scottish adolescents compares unfavourably with adolescents  
34 elsewhere in Europe. For example, the majority (97%) of Italian secondary school students (aged 15-  
35 21 years) had heard of skin cancer and 66% and 59%, respectively, correctly identified sun exposure  
36 and sunburn as skin cancer risk factors [16]. Similarly, a study of Greek adolescents (aged 15-18  
37 years) found that 89% were aware of the association between sun exposure and skin cancer risk  
38 [17].  
39  
40  
41  
42  
43  
44  
45  
46  
47  
48

49  
50 Adolescents also reported poor sun-protection practices with half (51%) reporting that they had  
51 experienced sunburn last summer. Over a third (38%) of those reporting sunburn experienced  
52 sunburn on more than one occasion and a tenth (10%) said that their skin went 'red, sore or  
53  
54  
55



1  
2  
3  
4  
5  
6  
7 blistered'. Sunscreen use was also notably poor with almost a fifth of adolescents reporting that  
8 they did not use sunscreen and less than half (47%) of those who did knew the SPF of the sunscreen  
9 used. Given the causal relationship between UV exposure and incidence of malignant melanoma,[7]  
10 our findings suggest that urgent action is required to reduce levels of sunburn among Scottish  
11 adolescents in order to reverse rising rates of malignant melanoma.  
12  
13  
14  
15  
16  
17

18 In common with previous studies from the UK,[21] USA,[18] Sweden [20] and New Zealand,[19] our  
19 research also identified riskier sun-related behaviour among female adolescents despite their  
20 greater skin cancer symptom and risk factor awareness. Females in our study were significantly  
21 more likely than males to report intentional tanning, the use of lotions or oils to aid tanning, and  
22 sunburn, yet were also significantly more likely to agree that 'change in the appearance of a mole'  
23 was a cancer sign and 'getting sunburnt more than once as a child' was a cancer risk factor. Indeed,  
24 females who reported getting sunburnt during the previous summer were statistically significantly  
25 more likely to recognise that 'change in the appearance of a mole' was a cancer sign. However,  
26 compared to males, females were also significantly more likely to use sunscreen, confirming findings  
27 of a systematic review that concluded that females were both more likely to adopt sun-protection  
28 practices and more likely to engage in risky sun-related behaviours, and that this association was  
29 most evident in adolescence and early adulthood.[26] Cognitive dissonance, denial and previous  
30 personal or vicarious experience have all been identified as pivotal factors in the relationship  
31 between adolescents' risk perception and risk behaviour.[27] Hence, health promotion in relation to  
32 sun safe practices needs to be underpinned by greater understanding of how adolescents balance  
33 harms and perceived benefits of tanning.  
34  
35  
36  
37  
38  
39  
40  
41  
42  
43  
44  
45  
46  
47  
48  
49

50 External influences of friends and family exerted a stronger influence on tanning attitudes than  
51 associations with feeling better, more attractive, or healthier. More than two-fifths agreed that  
52 most of their friends thought that a tan was a good thing, yet around a fifth said it made them feel  
53  
54  
55  
56  
57  
58  
59  
60

1  
2  
3  
4  
5  
6  
7 better and more attractive, and around a tenth that it made them feel healthier. The primacy of  
8 peer influences has also been found among similarly aged adolescents in Australasia. For example, a  
9 study in New Zealand found that 42% of females and 33% of males agreed that 'most of their friends  
10 think a suntan is a good thing',[19] and the majority (66%) of adolescents in an Australian study  
11 perceived friends to have pro-tanning attitudes.[28] Moreover, there is evidence from a Danish  
12 study that sunburn risk increases among adolescents (aged 13-17 years) whose parents hold positive  
13 attitudes towards tanning,[29] and the highest ranking source of sun protection information among  
14 young park-goers in London (aged 18-28 years) was 'parents and family'.[30] Further research is  
15 therefore required to assess peer and family influences on Scottish adolescents' tanning attitudes in  
16 order to determine the potential of peer-group and family-based interventions to reduce risky sun-  
17 related behaviours.

18  
19  
20  
21  
22  
23  
24  
25  
26  
27  
28  
29 Females in our study were statistically significantly more likely than males to report that their friends  
30 think a suntan is a good thing and that it made them feel better about themselves, healthier or more  
31 attractive to others. Tanning attitudes mediate the association between skin cancer knowledge and  
32 sun-related behaviour,[19,31] and more positive attitudes towards tanning among females are  
33 cosmetically and socially motivated.[20] Moreover, the influence of peers on tanning attitudes is  
34 known to increase as adolescents age.[19] In order to design age-appropriate sun safety  
35 interventions, further research is therefore required to better understand how the balance between  
36 social, cosmetic and health motivations changes over time, especially among young females.

#### 37 38 39 40 41 42 43 44 45 **Implications for future policy and research**

46  
47 Our research identifies an urgent need to develop sun safety interventions specifically for Scottish  
48 adolescents. However, our study also suggests that further research is required to ensure  
49 interventions overcome a number of challenges previously highlighted in the literature and  
50 confirmed by our own research. Research is required to assess how skin cancer knowledge, sun-  
51  
52  
53  
54

1  
2  
3  
4  
5  
6  
7 related behaviour, and tanning attitudes – and the influence of peers and family on knowledge,  
8  
9 behaviour and attitudes – changes as adolescents' age. Testing behaviour change techniques [32]  
10  
11 which show promise such as those based on dissonance [33,34] to address the known discordance  
12  
13 between sun protection intention and practice,[30,35] would also be useful. This research is vital  
14  
15 because previous interventions to change sun-safe knowledge and practice have been disappointing  
16  
17 [36] and it is not known which educational techniques are most effective.[37] Despite considerable  
18  
19 challenges of effective intervention development for this age group, previous research has found  
20  
21 that school-based educational interventions to raise adolescents' cancer awareness are  
22  
23 effective,[38] especially among females.[21,39] Hence, multi-component interventions that  
24  
25 incorporate education alongside challenges to societal beliefs around tanning (e.g., the association  
26  
27 between tanned skin, beauty and health) and environmental changes (e.g., provision of sunscreen,  
28  
29 hats and shade in secondary schools) may encourage protective sun-related behaviours. Future  
30  
31 research identified in support of intervention development has potential to have international  
32  
33 impact on reducing the burden on skin cancer.  
34

### 35 **Strengths and limitations**

36  
37 This is the first study to describe Scottish adolescents' sun-related behaviours and tanning attitudes  
38  
39 and assess associations with cancer awareness. It establishes an evidence-base to set the direction  
40  
41 of future research and policy interventions through on-going initiatives such as Detect Cancer Early  
42  
43 in Scotland and the National Awareness and Early Diagnosis Initiative (NAEDI) in England. However,  
44  
45 our study has a number of limitations. First, our sample is drawn from only one Scottish local  
46  
47 authority area (Glasgow City Council) and used purposive rather than probabilistic sampling. Thus,  
48  
49 although 2,173 adolescents from 20 (out of a possible 29) secondary schools in Glasgow were  
50  
51 surveyed, these findings may not be representative of the Scottish adolescent population. However,  
52  
53 Glasgow was purposefully selected as a research site due to known high incidence of malignant  
54  
55 melanoma in the Central Belt of Scotland, a densely populated urban region extending from Glasgow  
56  
57  
58  
59  
60

1  
2  
3  
4  
5  
6  
7 in the West to Edinburgh in the East.[2] Second, although validated instruments were used for data  
8 collection, results are contingent on adolescents' accurate recall of sun-related behaviour during  
9 summer 2012, around 9 to 12 months previously over the past year. Previous studies among  
10 adolescents have, ~~however,~~ found recall of sun-related behaviours to be reliable and valid.[31],  
11 although the possibility that recall bias influences our findings cannot be discounted due to the  
12 length of time since the previous summer (e.g., reporting of less severe sunburn, frequency of  
13 sunburn, or SPF of sunscreen used may be particularly prone to bias). Finally, because data were  
14 gathered as part of a cluster RCT,[22] in order to enable completion of all instruments during a 55-  
15 minute class, a shortened version of an instrument to assess sun-related knowledge, behaviour and  
16 tanning attitudes[19] was used which meant that replication of analysis conducted elsewhere using  
17 the full instrument could not be conducted.[19] Future research is therefore required using a  
18 representative sample of Scottish adolescents using the full version of the sun instrument with  
19 additional items to gather data on known skin cancer risk factors to enable such analyses and more  
20 comprehensive comparison with studies of similarly aged secondary school students in New Zealand  
21 [19] and Australia [28] where this instrument has been used.  
22  
23  
24  
25  
26  
27  
28  
29  
30  
31  
32  
33  
34  
35

## 36 CONCLUSION

37 Scottish adolescents' awareness of skin cancer symptoms and risk factors was low and matched by  
38 poor sun protection behaviours, most apparent in the high prevalence of (often severe) sunburn  
39 during the previous summer. These findings suggest that if the continuing rise in incidence of  
40 malignant melanoma in Scotland is to be halted, urgent action is required to increase skin cancer  
41 awareness and promote positive sun-related behaviour among Scottish adolescents. Our study  
42 highlights that the relationship between risk knowledge and risk behaviour are complex and  
43 different for adolescent males and females. Thus, further research is needed to inform the  
44 development of effective sun-safe interventions.  
45  
46  
47  
48  
49  
50  
51  
52  
53  
54  
55  
56  
57  
58  
59  
60

**ACKNOWLEDGEMENTS**

We are grateful to the adolescents who completed questionnaires, and the parents, schools, and teachers who supported this work. This independent study was funded by Teenage Cancer Trust and the Scottish Government Detect Cancer Early Programme. The views expressed are not necessarily those of Teenage Cancer Trust or the Scottish Government.

**CONTRIBUTION STATEMENT**

RGK designed and conducted data analysis. GH secured funding and ethical approval. IM and GH managed school and participant recruitment, and data collection. RGK and GH wrote the first draft of the paper, and LF, RDN, REO, and SH provided critical revision for important intellectual content. All authors read and approved the final manuscript.

**FUNDING STATEMENT**

This work was supported by Teenage Cancer Trust and the Scottish Government Detect Cancer Early programme.

**COMPETING INTERESTS STATEMENT**

IM is employed by Teenage Cancer Trust. RGK, LF, RDN, REO, SH and GH declare that they have no conflicts of interest.

## REFERENCES

1. Thomson CS, Woolnough S, Wickenden M et al. Sunbed use in children aged 11-17 in England: face to face quota sampling surveys in the National prevalence Study and Six Cities study. *BMJ* 2010;**340**:c877.
2. Quinn M, Wood H, Cooper N, Rowan S eds. Cancer Atlas of the United Kingdom and Ireland 1991–2000 Studies on Medical and Population Subjects No. 68. London: Office for National Statistics: 2005.
3. Information Services Division (iSD). 2013 Cancer Incidence in Scotland. Edinburgh: iSD: 2011.
4. Gandinia S, Serab F, Cattaruzzac MS et al. Meta-analysis of risk factors for cutaneous melanoma: I. Common and atypical naevi. *Eur J Cancer* 2005;**41**:28–44
5. Gandinia S, Serab F, Cattaruzzac MS et al. Meta-analysis of risk factors for cutaneous melanoma: III. Family history, actinic damage and phenotypic factors. *Eur J Cancer* 2005;**41**:2040-2059.
6. Gandinia S, Serab F, Cattaruzzac MS et al. Meta-analysis of risk factors for cutaneous melanoma: II sun exposure. *Eur. J. Cancer* 2005;**41**:45-60.
7. Parkin DM, Mesher D, Sasieni P. Cancer attributable to solar (ultraviolet) radiation exposure in the UK in 2010. *Br J Cancer* 2011;**105**:S66-S69.
8. Cancer Research UK (CRUK). Teenage and young adult cancer incidence statistics. 2013. Available online: <http://www.cancerresearchuk.org/cancer-info/cancerstats/teenage-and-young-adult-cancer/>
9. Cancer Research UK (CRUK). Skin cancer survival statistics. 2013. Available online: <http://www.cancerresearchuk.org/cancer-info/cancerstats/types/skin/survival/#source6>
10. Information Services Division (iSD). Trends in Cancer Survival in Scotland, 1983-2007. Edinburgh: iSD: 2010.
11. Betti RR, Vergani R, Tolomio E et al. Factors of delay in the diagnosis of melanoma. *Eur J Dermatol* 2003;**13**:183-188.

12. Krige JE, Isaacs S, Hudson DA et al. Delay in the diagnosis of cutaneous malignant melanoma. A prospective study in 250 patients. *Cancer* 1991;**68**:2064-2068.
13. Richard MA, Grob JJ, Avril MF et al. Melanoma and tumor thickness: Challenges of early diagnosis. *Arch Dermatol* 1999;**135**:269-274.
14. Department of Health (DH) Cancer Reform Strategy. London: DH: 2007.
15. Scottish Government. Detect Cancer Early Initiative: Draft Plan. Edinburgh: Scottish Government: 2011.
16. Suppa M, Cazzaniga S, Fagnoli MC, et al. Knowledge, perceptions and behaviours about skin cancer and sun protection among secondary school students from Central Italy. *J Eur Acad Dermatol Verereol*, 2013;**27**:571-579.
17. Saridi M, Toska A, Pappa V et al Knowledge, attitudes and self care practices related to sun protection among teenagers in Greece. *Arch Hellenic Med* 2009;**26**:355-65.
18. Knight JM, Kirincich AN, Farmer ER, et al. Awareness of the risks of tanning lamps does not influence behaviour among college students. *Arch Dermatol* 2002;**138**:1311-1315.
19. Wright C, Reeder AI, Gray A et al. Child sun protection: sun-related attitudes mediate the association between children's knowledge and behaviours. *J Pediatr Child Health* 2008;**44**:692-698.
20. Sjoberg, Holm L-E, Ullen H, et al. Tanning and risk perception in adolescents. *Health, Risk and Society* 2004;**6**:81-94.
21. Kyle RG, Nicoll A, Forbat L, et al. Adolescents' awareness of cancer risk factors and associations with health-related behaviours. *Health Educ Res* 2013;**28**:816-827.
22. Kyle RG, Macmillan I, Rauchhaus P, et al. Adolescent Cancer Education (ACE) to increase adolescent and parent cancer awareness and communication: Study protocol for a cluster randomised controlled trial. *Trials* 2013;**14**:286.
23. Economic and Social Research Council (ESRC): ESRC Framework for Research Ethics. Swindon: ESRC: 2010.

- 1  
2  
3  
4  
5  
6  
7 24. Cancer Research UK. Cancer Awareness Measure Toolkit V2.1. London: Cancer Research UK:  
8 2011.
- 9  
10 25. Kyle RG, Forbat L, Hubbard G. Cancer awareness among adolescents in Britain: a cross-sectional  
11 study. *BMC Public Health* 2012;**12**:580.
- 12  
13  
14 26. Kasparian NA, McLoone JK, Meiser B. Skin-cancer related prevention and screening behaviours:  
15 a review of the literature. *J Behav Med* 2009;**32**:406-428.
- 16  
17  
18 27. Larsman P, Eklof M, Torner M. Adolescents' risk perceptions in relation to risk behaviour with  
19 long-term health consequences; antecedents and outcomes: a literature review. *Safety Science*  
20 2012;**50**:1740-1748.
- 21  
22  
23 28. Volkov A, Dobbinson S, Wakefield M, et al. Seven-year trends in sun protection and sunburn  
24 among Australian adolescents and adults. *Aust N Z J Public Health* 2013;**37**: 63-69.
- 25  
26  
27 29. Behrens CL, Thorgaard C, Philip A, et al. Sunburn in children and adolescents: associations with  
28 parents' behaviour and attitudes. *Scand J Public Health* 2013;**41**:302-310.
- 29  
30  
31 30. Hedges T, Scriven A. Young park users' attitudes and behaviour to sun protection. *Glob Health*  
32 *Promot* 2010;**17**:24-31.
- 33  
34  
35 31. Andreeva VA, Reynolds KD, Buller DB, et al. Concurrent psychosocial predictors of sun safety  
36 among middle school youth. *J Sch Health* 2008;**78**:374-381.
- 37  
38  
39 32. Michie S, Richardson M, Johnston M, et al. The behaviour change taxonomy (v1) of 93  
40 hierarchically clustered techniques: building an international consensus for the reporting of  
41 behaviour change interventions. *Ann Behav Med* 2013;**46**:81-95.
- 42  
43  
44 33. Freijy T, Kothe EJ. Dissonance-based interventions for health behaviour change: a systematic  
45 review. *Br J Health Psychol* 2013;**18**:310-337.
- 46  
47  
48 34. Stone J, Fernandez NC. When thinking about less failure causes more dissonance: the effect of  
49 elaboration and recall on behaviour change following hypocrisy. *Social Influence* 2011;**6**:199-  
50 211.
- 51  
52  
53  
54  
55  
56  
57  
58  
59  
60



- 1  
2  
3  
4  
5  
6  
7 35. Dobbinson SJ, Jansen K, Dixon HG, et al. Assessing population-wide behaviour change:  
8 concordance of 10-year trends in self-reported and observed sun protection. *Int J Public Health*  
9 2013 (Online Early) doi: 10.1007/s00038-013-0454-5  
10  
11  
12 36. Craciun C, Schuz N, Lippke S, et al. Enhancing planning stages for sunscreen use at different  
13 stages of change. *Health Educ Res* 2012;**27**:857-867.  
14  
15  
16 37. Bellamy R A. Systematic review of educational interventions for promoting sun protection  
17 knowledge, attitudes and behaviour following the QUESTS approach. *Med Teach* 2005;**27**:269-  
18 275.  
19  
20  
21 ~~37-38.~~ Saraiya M, Glanz K, Briss PA, et al. Interventions to prevent skin cancer by reducing exposure  
22 to ultraviolet radiation: a systematic review. *Am J Prev Med* 2004;**27**:422-426.  
23  
24  
25  
26 ~~38-39.~~ Kyle RG, Forbat L, Rauchhaus P et al. Increased cancer awareness among British adolescents  
27 after a school-based educational intervention: a controlled before-and-after study with 6-  
28 month follow-up. *BMC Public Health* 2013;**13**:190.  
29  
30  
31  
32  
33  
34  
35  
36  
37  
38  
39  
40  
41  
42  
43  
44  
45  
46  
47  
48  
49  
50  
51  
52  
53  
54  
55  
56  
57  
58  
59  
60

Formatted: Font: Bold

## TABLES

**Table 1:** Sample socio-demographic characteristics

|                                 | n     | %      |
|---------------------------------|-------|--------|
| <i>Gender</i>                   |       |        |
| Male                            | 1,032 | 47.5   |
| Female                          | 1,102 | 50.7   |
| Missing                         | 39    | 1.8    |
| <i>Age</i>                      |       |        |
| Mean (SD)                       | 12.4  | (0.55) |
| <i>Ethnicity</i>                |       |        |
| White                           | 1,826 | 84.0   |
| Mixed                           | 75    | 3.5    |
| Asian                           | 131   | 6.0    |
| Black                           | 57    | 2.6    |
| Chinese                         | 15    | 0.7    |
| Other                           | 28    | 1.3    |
| Missing                         | 41    | 1.9    |
| <i>Knew someone with cancer</i> |       |        |
| Yes                             | 1,266 | 58.3   |
| No                              | 783   | 36.0   |
| Missing                         | 124   | 5.7    |

**Table 2:** Tanning attitudes and gender

| Statement                                                             | Female            | Male              | Significance*                                                         |
|-----------------------------------------------------------------------|-------------------|-------------------|-----------------------------------------------------------------------|
| % Strongly agree/agree (n)                                            |                   |                   |                                                                       |
| Most of my friends think a suntan is a good thing.                    | <b>53.1 (554)</b> | <b>37.7 (355)</b> | <b><math>\chi^2(1, 1985)=47.48</math><br/><math>p&lt;0.001</math></b> |
| Most of my family think a suntan is a good thing.                     | 29.0 (301)        | 27.8 (260)        | $\chi^2(1, 1974)=0.36$<br>$p=0.548$                                   |
| I like to have a suntan because it makes me feel better about myself. | <b>30.8 (320)</b> | <b>18.0 (169)</b> | <b><math>\chi^2(1, 1978)=43.10</math><br/><math>p&lt;0.001</math></b> |
| A suntan makes me feel more attractive to others.                     | <b>22.7 (235)</b> | <b>18.1 (169)</b> | <b><math>\chi^2(1, 1969)=6.40</math><br/><math>p=0.011</math></b>     |
| I like to have a suntan because I feel healthier.                     | <b>16.2 (169)</b> | <b>10.1 (95)</b>  | <b><math>\chi^2(1, 1980)=15.99</math><br/><math>p&lt;0.001</math></b> |

## Notes:

\* Pearson's  $\chi^2$  test for 2x2 tables (i.e., strongly agree/agree vs. disagree/strongly disagree/don't know). Statistically significant associations at the  $p<0.05$  level are emboldened.

**Table 3:** Tanning attitudes and sun-related behaviour

| Statement<br>% Strongly agree/agree (n)                               | Female            |                   |                                              |                   |                   |                                             |                  |                   |                                             |
|-----------------------------------------------------------------------|-------------------|-------------------|----------------------------------------------|-------------------|-------------------|---------------------------------------------|------------------|-------------------|---------------------------------------------|
|                                                                       | Sunbathed         |                   |                                              | Sunburnt          |                   |                                             | Sunbed use       |                   |                                             |
|                                                                       | Yes               | No                | Significance*                                | Yes               | No                | Significance*                               | Yes              | No                | Significance*                               |
| Most of my friends think a suntan is a good thing.                    | <b>61.8 (371)</b> | <b>40.6 (177)</b> | $\chi^2(1, 1036)=45.71$<br><b>p&lt;0.001</b> | <b>60.1 (370)</b> | <b>42.7 (157)</b> | $\chi^2(1, 984)=28.05$<br><b>p&lt;0.001</b> | 62.1 (41)        | 52.1 (500)        | $\chi^2(1, 1026)=2.50$<br>p=0.114           |
| Most of my family think a suntan is a good thing.                     | <b>35.7 (214)</b> | <b>19.9 (86)</b>  | $\chi^2(1, 1031)=30.44$<br><b>p&lt;0.001</b> | 31.1 (191)        | 25.6 (94)         | $\chi^2(1, 982)=3.31$<br>p=0.069            | 39.1 (25)        | 28.1 (269)        | $\chi^2(1, 1021)=3.51$<br>p=0.061           |
| I like to have a suntan because it makes me feel better about myself. | <b>42.6 (255)</b> | <b>14.5 (63)</b>  | $\chi^2(1, 1032)=93.32$<br><b>p&lt;0.001</b> | <b>38.0 (234)</b> | <b>20.6 (75)</b>  | $\chi^2(1, 980)=32.02$<br><b>p&lt;0.001</b> | 33.3 (22)        | 30.4 (291)        | $\chi^2(1, 1022)=0.24$<br>p=0.622           |
| A suntan makes me feel more attractive to others.                     | <b>31.3 (187)</b> | <b>10.9 (47)</b>  | $\chi^2(1, 1029)=59.62$<br><b>p&lt;0.001</b> | <b>26.6 (163)</b> | <b>16.4 (60)</b>  | $\chi^2(1, 979)=13.55$<br><b>p&lt;0.001</b> | 26.2 (17)        | 22.4 (213)        | $\chi^2(1, 1018)=0.50$<br>p=0.478           |
| I like to have a suntan because I feel healthier.                     | <b>23.2 (139)</b> | <b>6.9 (30)</b>   | $\chi^2(1, 1035)=48.86$<br><b>p&lt;0.001</b> | <b>18.0 (111)</b> | <b>12.4 (46)</b>  | $\chi^2(1, 986)=5.40$<br><b>p=0.020</b>     | 19.7 (13)        | 15.6 (150)        | $\chi^2(1, 1025)=0.76$<br>p=0.383           |
| Statement<br>% Strongly agree/agree (n)                               | Male              |                   |                                              |                   |                   |                                             |                  |                   |                                             |
|                                                                       | Sunbathed         |                   |                                              | Sunburnt          |                   |                                             | Sunbed use       |                   |                                             |
|                                                                       | Yes               | No                | Significance*                                | Yes               | No                | Significance*                               | Yes              | No                | Significance*                               |
| Most of my friends think a suntan is a good thing.                    | <b>54.8 (154)</b> | <b>30.3 (197)</b> | $\chi^2(1, 932)=50.36$<br><b>p&lt;0.001</b>  | <b>41.9 (195)</b> | <b>34.5 (143)</b> | $\chi^2(1, 880)=5.18$<br><b>p=0.023</b>     | 37.9 (22)        | 38.0 (325)        | $\chi^2(1, 914)=0.00$<br>p=0.996            |
| Most of my family think a suntan is a good thing.                     | <b>43.5 (121)</b> | <b>21.1 (137)</b> | $\chi^2(1, 926)=48.49$<br><b>p&lt;0.001</b>  | 30.3 (139)        | 25.2 (104)        | $\chi^2(1, 876)=2.55$<br>p=0.110            | <b>39.7 (23)</b> | <b>26.4 (225)</b> | $\chi^2(1, 909)=4.78$<br><b>p=0.029</b>     |
| I like to have a suntan because it makes me feel better about myself. | <b>32.9 (91)</b>  | <b>11.7 (76)</b>  | $\chi^2(1, 928)=59.06$<br><b>p&lt;0.001</b>  | <b>21.6 (100)</b> | <b>13.8 (57)</b>  | $\chi^2(1, 876)=9.02$<br><b>p=0.003</b>     | <b>29.3 (17)</b> | <b>17.0 (145)</b> | $\chi^2(1, 911)=5.63$<br><b>p=0.018</b>     |
| A suntan makes me feel more attractive to others.                     | <b>32.1 (88)</b>  | <b>12.2 (79)</b>  | $\chi^2(1, 924)=51.88$<br><b>p&lt;0.001</b>  | 20.0 (93)         | 15.9 (66)         | $\chi^2(1, 880)=2.59$<br>p=0.108            | <b>30.9 (17)</b> | <b>17.1 (145)</b> | $\chi^2(1, 905)=6.74$<br><b>p=0.009</b>     |
| I like to have a suntan because I feel healthier.                     | <b>19.8 (54)</b>  | <b>5.8 (38)</b>   | $\chi^2(1, 928)=42.16$<br><b>p&lt;0.001</b>  | <b>12.0 (56)</b>  | <b>7.2 (30)</b>   | $\chi^2(1, 884)=5.88$<br><b>p=0.015</b>     | <b>25.0 (14)</b> | <b>9.0 (77)</b>   | $\chi^2(1, 926)=14.88$<br><b>p&lt;0.001</b> |

Notes:  
\* Pearson's  $\chi^2$  test for 2x2 tables (i.e., Strongly agree/agree vs. Strongly disagree/disagree/neither agree or disagree/don't know). Statistically significant associations at the p<0.05 level are emboldened.

**Table 4:** Associations between sun-related behaviour and cancer awareness

| Symptom:<br>'change in the appearance of a mole'<br>% Yes (n)                              | Sunbathed  |            |                                   | Sunburnt          |                   |                                                           | Sunbed use |            |                                   |
|--------------------------------------------------------------------------------------------|------------|------------|-----------------------------------|-------------------|-------------------|-----------------------------------------------------------|------------|------------|-----------------------------------|
|                                                                                            | Yes        | No         | Significance*                     | Yes               | No                | Significance*                                             | Yes        | No         | Significance*                     |
| Female                                                                                     | 50.1 (304) | 46.0 (204) | $\chi^2(1, 1050)=1.67$<br>p=0.197 | <b>51.0 (317)</b> | <b>44.1 (163)</b> | <b><math>\chi^2(1, 991)=4.54</math></b><br><b>p=0.033</b> | 55.4 (36)  | 47.6 (461) | $\chi^2(1, 1033)=1.47$<br>p=0.225 |
| Male                                                                                       | 43.8 (127) | 43.1 (289) | $\chi^2(1, 960)=0.036$<br>p=0.850 | 44.6 (210)        | 41.9 (178)        | $\chi^2(1, 896)=0.67$<br>p=0.415                          | 36.2 (21)  | 44.1 (386) | $\chi^2(1, 934)=1.37$<br>p=0.243  |
| Risk factor: 'getting sunburnt more<br>than once as a child'<br>% Strongly agree/agree (n) | Sunbathed  |            |                                   | Sunburnt          |                   |                                                           | Sunbed use |            |                                   |
|                                                                                            | Yes        | No         | Significance*                     | Yes               | No                | Significance*                                             | Yes        | No         | Significance*                     |
| Female                                                                                     | 43.9 (265) | 42.4 (186) | $\chi^2(1, 1043)=0.24$<br>p=0.628 | 44.5 (276)        | 41.3 (151)        | $\chi^2(1, 986)=1.00$<br>p=0.318                          | 36.4 (24)  | 43.9 (422) | $\chi^2(1, 1027)=1.43$<br>p=0.231 |
| Male                                                                                       | 38.9 (112) | 37.4 (244) | $\chi^2(1, 941)=0.20$<br>p=0.657  | 40.8 (189)        | 34.6 (144)        | $\chi^2(1, 879)=3.59$<br>p=0.058                          | 41.1 (23)  | 37.5 (321) | $\chi^2(1, 913)=0.29$<br>p=0.589  |

Notes:

\* Pearson's  $\chi^2$  test for 2x2 tables (i.e., Symptom: Yes vs. No/Don't know; Risk factor: Strongly agree/agree vs. Strongly disagree/disagree/neither agree or disagree/don't know). Statistically significant associations at the p<0.05 level are emboldened.

STROBE 2007 (v4) Statement—Checklist of items that should be included in reports of *cross-sectional studies*

| Section/Topic             | Item # | Recommendation                                                                                                                                                                       | Reported on page # |
|---------------------------|--------|--------------------------------------------------------------------------------------------------------------------------------------------------------------------------------------|--------------------|
| Title and abstract        | 1      | (a) Indicate the study’s design with a commonly used term in the title or the abstract                                                                                               | 1                  |
|                           |        | (b) Provide in the abstract an informative and balanced summary of what was done and what was found                                                                                  | 2                  |
| <b>Introduction</b>       |        |                                                                                                                                                                                      |                    |
| Background/rationale      | 2      | Explain the scientific background and rationale for the investigation being reported                                                                                                 | 4 to 5             |
| Objectives                | 3      | State specific objectives, including any prespecified hypotheses                                                                                                                     | 5                  |
| <b>Methods</b>            |        |                                                                                                                                                                                      |                    |
| Study design              | 4      | Present key elements of study design early in the paper                                                                                                                              | 5 to 8             |
| Setting                   | 5      | Describe the setting, locations, and relevant dates, including periods of recruitment, exposure, follow-up, and data collection                                                      | 6                  |
| Participants              | 6      | (a) Give the eligibility criteria, and the sources and methods of selection of participants                                                                                          | 6                  |
| Variables                 | 7      | Clearly define all outcomes, exposures, predictors, potential confounders, and effect modifiers. Give diagnostic criteria, if applicable                                             | 6 to 7             |
| Data sources/ measurement | 8*     | For each variable of interest, give sources of data and details of methods of assessment (measurement). Describe comparability of assessment methods if there is more than one group | 6 to 7             |
| Bias                      | 9      | Describe any efforts to address potential sources of bias                                                                                                                            | 15                 |
| Study size                | 10     | Explain how the study size was arrived at                                                                                                                                            | 6                  |
| Quantitative variables    | 11     | Explain how quantitative variables were handled in the analyses. If applicable, describe which groupings were chosen and why                                                         | 7                  |
| Statistical methods       | 12     | (a) Describe all statistical methods, including those used to control for confounding                                                                                                | 8                  |
|                           |        | (b) Describe any methods used to examine subgroups and interactions                                                                                                                  | 8                  |
|                           |        | (c) Explain how missing data were addressed                                                                                                                                          | 7                  |
|                           |        | (d) If applicable, describe analytical methods taking account of sampling strategy                                                                                                   | N/A                |
|                           |        | (e) Describe any sensitivity analyses                                                                                                                                                | N/A                |
| <b>Results</b>            |        |                                                                                                                                                                                      |                    |

1  
2  
3  
4  
5  
6  
7  
8  
9  
10  
11  
12  
13  
14  
15  
16  
17  
18  
19  
20  
21  
22  
23  
24  
25  
26  
27  
28  
29  
30  
31  
32  
33  
34  
35  
36  
37  
38  
39  
40  
41  
42  
43  
44  
45  
46  
47  
48  
49

|                          |     |                                                                                                                                                                                                              |               |
|--------------------------|-----|--------------------------------------------------------------------------------------------------------------------------------------------------------------------------------------------------------------|---------------|
| Participants             | 13* | (a) Report numbers of individuals at each stage of study—eg numbers potentially eligible, examined for eligibility, confirmed eligible, included in the study, completing follow-up, and analysed            | 8             |
|                          |     | (b) Give reasons for non-participation at each stage                                                                                                                                                         | 6             |
|                          |     | (c) Consider use of a flow diagram                                                                                                                                                                           | N/A           |
| Descriptive data         | 14* | (a) Give characteristics of study participants (eg demographic, clinical, social) and information on exposures and potential confounders                                                                     | 8 and Table 1 |
|                          |     | (b) Indicate number of participants with missing data for each variable of interest                                                                                                                          | 8 and Table 1 |
| Outcome data             | 15* | Report numbers of outcome events or summary measures                                                                                                                                                         | 9 to 12       |
| Main results             | 16  | (a) Give unadjusted estimates and, if applicable, confounder-adjusted estimates and their precision (eg, 95% confidence interval). Make clear which confounders were adjusted for and why they were included | 9 to 12       |
|                          |     | (b) Report category boundaries when continuous variables were categorized                                                                                                                                    | N/A           |
|                          |     | (c) If relevant, consider translating estimates of relative risk into absolute risk for a meaningful time period                                                                                             | N/A           |
| Other analyses           | 17  | Report other analyses done—eg analyses of subgroups and interactions, and sensitivity analyses                                                                                                               | 9 to 12       |
| <b>Discussion</b>        |     |                                                                                                                                                                                                              |               |
| Key results              | 18  | Summarise key results with reference to study objectives                                                                                                                                                     | 12 to 14      |
| Limitations              | 19  | Discuss limitations of the study, taking into account sources of potential bias or imprecision. Discuss both direction and magnitude of any potential bias                                                   | 15 to 16      |
| Interpretation           | 20  | Give a cautious overall interpretation of results considering objectives, limitations, multiplicity of analyses, results from similar studies, and other relevant evidence                                   | 12 to 14      |
| Generalisability         | 21  | Discuss the generalisability (external validity) of the study results                                                                                                                                        | 15            |
| <b>Other information</b> |     |                                                                                                                                                                                                              |               |
| Funding                  | 22  | Give the source of funding and the role of the funders for the present study and, if applicable, for the original study on which the present article is based                                                | 3             |

\*Give information separately for cases and controls in case-control studies and, if applicable, for exposed and unexposed groups in cohort and cross-sectional studies.

**Note:** An Explanation and Elaboration article discusses each checklist item and gives methodological background and published examples of transparent reporting. The STROBE checklist is best used in conjunction with this article (freely available on the Web sites of PLoS Medicine at <http://www.plosmedicine.org/>, Annals of Internal Medicine at <http://www.annals.org/>, and Epidemiology at <http://www.epidem.com/>). Information on the STROBE Initiative is available at [www.strobe-statement.org](http://www.strobe-statement.org).
